# Supplementary material for: Is there a gender gap in chemical sciences scholarly communication?
Source: PubMed Central journal article supplement (PMC7057853; doi:10.1039/c9sc04090k), 2020-01-28
Supplement: SC-011-C9SC04090K-s002.pdf [file SC-011-C9SC04090K-s002.pdf]

## Electronic Supplementary Information

# Is there a gender gap in Chemical Sciences scholarly communications?

A. E. Day\*<sup>a</sup>, P. Corbett<sup>a</sup> and J. Boyle<sup>a</sup>

<sup>a</sup>Royal Society of Chemistry, Thomas Graham House (290), Science Park, Milton Road, Cambridge, CB4 0WF

### **Corresponding Author**

\*E-mail: [daya@rsc.org](mailto:daya@rsc.org) (A.E.D.).

For every figure shown in the parent article, the corresponding numbers plotted, with percentages and confidence intervals, significances and p-values are given in the tables of this ESI numbered with the section number that the figure appears in e.g. numbers corresponding to Figures 3 and 4 in section B2 of the main article are displayed in Table B2a and B2b of the ESI.

**Table ESI\_1: RSC journals information**

| Journal Name                                       | Journal Sercode | Impact factor (2017) <sup>1</sup> | Journal Editorial Model                      | Journal Chemistry sub-disciplines <sup>2</sup>            |
|----------------------------------------------------|-----------------|-----------------------------------|----------------------------------------------|-----------------------------------------------------------|
| Analyst                                            | an              | 3.864                             | AE                                           | Analytical                                                |
| Analytical Methods                                 | ay              | 2.073                             | AE                                           | Analytical                                                |
| Biomaterials Science                               | bm              | 5.831                             | AE                                           | Materials                                                 |
| Chemical Communications                            | cc              | 6.29                              | Hybrid                                       | Multidisciplinary                                         |
| CrystEngComm                                       | ce              | 3.304                             | Hybrid                                       | Materials                                                 |
| Physical Chemistry Chemical Physics                | cp              | 3.906                             | Hybrid                                       | Physical                                                  |
| Chemical Society Reviews                           | cs              |                                   | AE (with in-house pre-submission assessment) | Multidisciplinary                                         |
| Catalysis Science & Technology                     | cy              | 5.365                             | AE                                           | Catalysis                                                 |
| Dalton Transactions                                | dt              | 4.099                             | Hybrid                                       | Inorganic                                                 |
| Energy & Environmental Science                     | ee              |                                   | In-house                                     | Catalysis; Energy & Sustainability                        |
| Environmental Science: Processes & Impacts         | em              | 2.491                             | AE (with in-house pre-screening)             | Environmental                                             |
| Environmental Science: Nano                        | en              | 6.087                             | Hybrid                                       | Environmental; Nanoscience; Engineering                   |
| Environmental Science: Water Research & Technology | ew              | 3.649                             | AE                                           | Environmental; Engineering                                |
| Faraday Discussions                                | fd              | 3.427                             | Other                                        | Physical                                                  |
| Food & Function                                    | fo              | 3.289                             | AE                                           | Chemistry and Biology Interface                           |
| Green Chemistry                                    | gc              | 8.586                             | Hybrid                                       | Catalysis; Energy & Sustainability                        |
| Integrative Biology                                | ib              | 3.294                             | AE                                           | Chemistry and Biology Interface                           |
| Journal of Analytical Atomic Spectrometry          | ja              | 3.608                             | In-house                                     | Analytical                                                |
| Journal of Materials Chemistry                     | jm              |                                   | Hybrid                                       | Materials                                                 |
| Lab on a Chip                                      | lc              | 5.995                             | Hybrid                                       | Nanoscience; Engineering                                  |
| Molecular BioSystems                               | mb              |                                   | Hybrid                                       | Chemistry and Biology Interface                           |
| MedChemComm                                        | md              | 2.342                             | AE                                           | Chemistry and Biology Interface                           |
| Molecular Systems Design & Engineering             | me              |                                   | In-house                                     | Energy & Sustainability; Materials; Physical; Engineering |
| Materials Horizons                                 | mh              | 13.183                            | In-house                                     | Materials                                                 |
| Molecular Omics                                    | mo              |                                   | Hybrid                                       | Chemistry and Biology Interface                           |
| Metallomics                                        | mt              | 4.069                             | In-house                                     | Chemistry and Biology Interface                           |
| Nanoscale Horizons                                 | nh              | 9.391                             | In-house                                     | Nanoscience                                               |
| New Journal of Chemistry                           | nj              | 3.201                             | AE                                           | Multidisciplinary                                         |
| Natural Product Reports                            | np              | 11.406                            | In-house                                     | Chemistry and Biology Interface                           |
| Nanoscale                                          | nr              | 7.233                             | AE (with in-house pre-screening)             | Nanoscience                                               |
| Organic & Biomolecular Chemistry                   | ob              | 3.423                             | Hybrid                                       | Chemistry and Biology Interface; Catalysis; Organic       |
| Photochemical & Photobiological Sciences           | pp              | 2.902                             | AE                                           | Chemistry and Biology Interface; Physical                 |
| Polymer Chemistry                                  | py              | 4.927                             | AE                                           | Materials                                                 |
| Inorganic Chemistry Frontiers                      | qi              | 5.106                             | AE                                           | Inorganic                                                 |
| Materials Chemistry Frontiers                      | qm              |                                   | AE                                           | Materials                                                 |
| Organic Chemistry Frontiers                        | qo              | 5.455                             | AE                                           | Organic                                                   |
| RSC Advances                                       | ra              | 2.936                             | AE                                           | Multidisciplinary                                         |
| Reaction Chemistry & Engineering                   | re              | 4.641                             | In-house                                     | Catalysis; Engineering                                    |
| Chemistry Education Research and Practice          | rp              | 1.621                             | AE                                           | Multidisciplinary                                         |
| Chemical Science                                   | sc              | 9.063                             | AE (with in-house pre-screening)             | Multidisciplinary                                         |
| Sustainable Energy & Fuels                         | se              |                                   | AE                                           | Catalysis; Energy & Sustainability                        |
| Soft Matter                                        | sm              | 3.709                             | AE                                           | Materials; Physical                                       |
| Journal of Materials Chemistry A                   | ta              | 9.931                             | Hybrid                                       | Energy & Sustainability; Materials                        |
| Journal of Materials Chemistry B                   | tb              | 4.776                             | Hybrid                                       | Materials                                                 |
| Journal of Materials Chemistry C                   | tc              | 5.976                             | Hybrid                                       | Materials                                                 |
| Toxicology Research                                | tx              | 1.89                              | AE                                           | Chemistry and Biology Interface                           |
| Royal Society Open Science                         | -               |                                   | AE                                           |                                                           |

<sup>1</sup> Impact factors based on 2017 Journal Citation Reports<sup>®</sup> (Clarivate Analytics, June 2018)

<sup>2</sup> Journal Chemistry sub-disciplines based on <http://www.rsc.org/journals-books-databases/about-journals/>

Figure ESI\_2  
categorisation

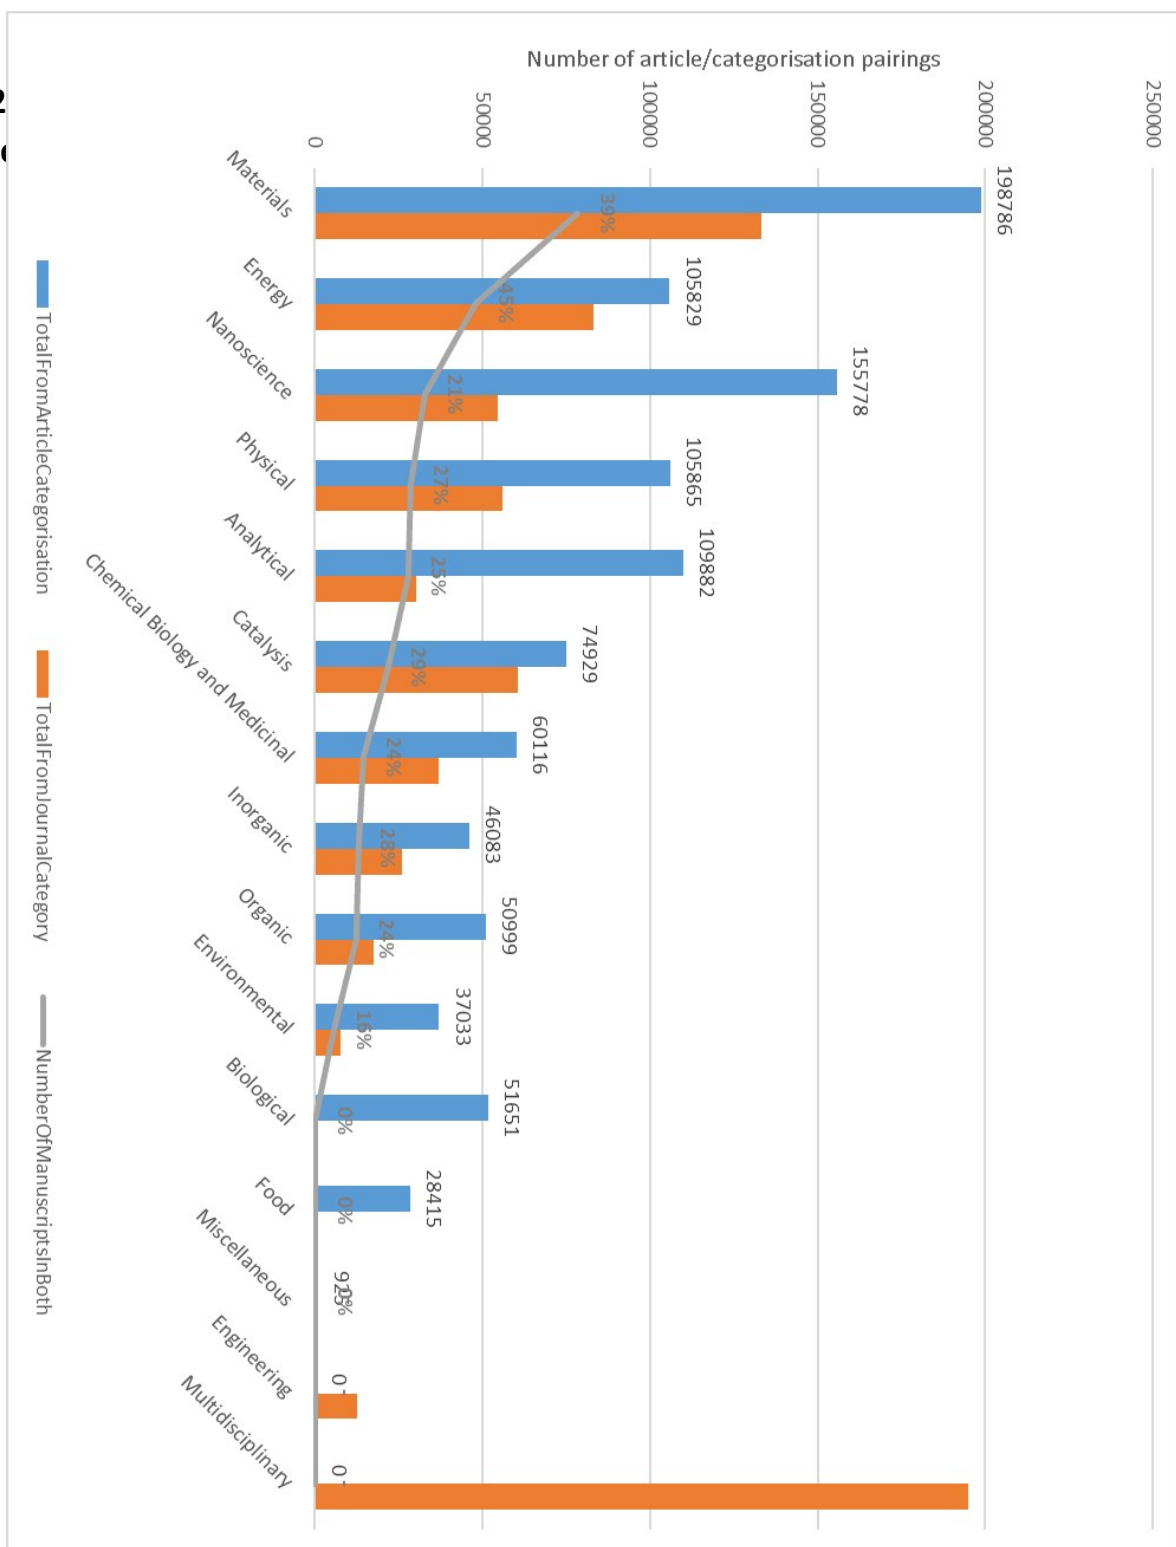

**Table A1 (for Figure 1): Breakdown of chemistry researcher gender by HESA contract level<sup>3</sup>**

| HESA Contract Level                                                      | Female | Male | Unknown | Total For Level | Total Gender Deduced | Female Percentage | Male Percentage | LCI   | UCI   | LCI Count | UCI Count | Significance <sup>4</sup> | Adjusted P-Value |
|--------------------------------------------------------------------------|--------|------|---------|-----------------|----------------------|-------------------|-----------------|-------|-------|-----------|-----------|---------------------------|------------------|
| A0 to C2 Senior management                                               | 5      | 25   | 0       | 30              | 30                   | 16.7              | 83.3            | 6.86  | 34.04 | 2.06      | 10.21     |                           | 1.00e+00         |
| D and E Head of Schools/ Senior Function head                            | 10     | 60   | 0       | 70              | 70                   | 14.3              | 85.7            | 7.75  | 24.54 | 5.43      | 17.17     | Significant               | 2.41e-02         |
| F1 Professor                                                             | 65     | 540  | 0       | 605             | 605                  | 10.7              | 89.3            | 8.51  | 13.48 | 51.47     | 81.53     | Significant               | 4.59e-36         |
| I0 Senior/principal lecturer, Reader, Principal Research fellow          | 105    | 410  | 0       | 515             | 515                  | 20.4              | 79.6            | 17.13 | 24.09 | 88.20     | 124.05    | Significant               | 2.44e-08         |
| J0 Lecturer, Senior Lecturer, Senior Research Fellow                     | 225    | 545  | 0       | 770             | 770                  | 29.2              | 70.8            | 26.12 | 32.53 | 201.10    | 250.49    |                           | 1.00e+00         |
| K0 Lecturer, Research fellow, Senior research assistant, Teaching fellow | 720    | 1475 | 0       | 2195            | 2195                 | 32.8              | 67.2            | 30.87 | 34.79 | 677.58    | 763.74    |                           | 1.00e+00         |
| L0 Research assistant, Teaching assistant                                | 320    | 545  | 0       | 865             | 865                  | 37.0              | 63.0            | 33.84 | 40.26 | 292.72    | 348.27    |                           | 1.00e+00         |
| Doctorate Students                                                       | 1660   | 2545 | 0       | 4205            | 4205                 | 39.5              | 60.5            | 38.01 | 40.96 | 1598.31   | 1722.50   | Significant               | 7.20e-12         |

<sup>3</sup> This publication contains data provided by the Higher Education Statistics Agency (HESA), based on the HESA Student and Staff record from 2015/16. Copyright: Higher Education Statistics Agency Limited. Neither the Higher Education Statistics Agency Limited nor HESA Services Limited can accept responsibility for any inferences or conclusions derived by third parties from data or other information supplied by HESA Services

<sup>4</sup> Significance calculated compared to baseline of average female percentage over all these contract levels (33.6%)

**Table A2 (for Figure 2): Breakdown of chemistry researcher gender by RSC membership level**

| RSC membership level    | Female | Male | Unknown | Total For Level | Total Gender Deduced | Female Percentage | Male Percentage | LCI   | UCI   | LCI Count | UCI Count | Significance <sup>5</sup> | Adjusted P-Value |
|-------------------------|--------|------|---------|-----------------|----------------------|-------------------|-----------------|-------|-------|-----------|-----------|---------------------------|------------------|
| Affiliate               | 389    | 632  | 366     | 1387            | 1021                 | 38.1              | 61.9            | 35.17 | 41.12 | 359.09    | 419.82    |                           | 1.00e+00         |
| Affiliate Undergraduate | 125    | 170  | 46      | 341             | 295                  | 42.4              | 57.6            | 36.87 | 48.08 | 108.76    | 141.82    |                           | 1.00e+00         |
| Associate Member        | 988    | 1392 | 422     | 2802            | 2380                 | 41.5              | 58.5            | 39.55 | 43.50 | 941.25    | 1035.40   | Significant               | 2.04e-05         |
| Fellow                  | 297    | 1558 | 479     | 2334            | 1855                 | 16.0              | 84.0            | 14.41 | 17.75 | 267.32    | 329.28    | Significant               | 1.26e-76         |
| Honorary Fellow         | 4      | 17   | 5       | 26              | 21                   | 19.0              | 81.0            | 7.08  | 40.59 | 1.49      | 8.52      |                           | 1.00e+00         |
| Member                  | 787    | 1838 | 508     | 3133            | 2625                 | 30.0              | 70.0            | 28.26 | 31.76 | 741.78    | 833.76    | Significant               | 9.01e-07         |

<sup>5</sup> Significance calculated compared to baseline of average female percentage over all membership levels (34.3%)

**Table B2a (for Figure 3): Breakdown of corresponding author gender with number of submissions (numbers greater than 30 have been omitted)**

| Number of submissions | Female | Male | Unknown | Total For Level | Total Gender-Deduced | Female Percentage | Male Percentage | LCI   | UCI   | LCI Count | UCI Count | Significance <sup>6</sup> | Adjusted P-Value |
|-----------------------|--------|------|---------|-----------------|----------------------|-------------------|-----------------|-------|-------|-----------|-----------|---------------------------|------------------|
| 1                     | 4413   | 8585 | 11798   | 24796           | 12998                | 34.0              | 66.0            | 33.14 | 34.77 | 4307.81   | 4519.42   | Significant               | 9.63e-143        |
| 2                     | 4622   | 9977 | 10354   | 24953           | 14599                | 31.7              | 68.3            | 30.91 | 32.42 | 4512.56   | 4732.85   | Significant               | 2.08e-96         |
| 3                     | 2517   | 5850 | 6542    | 14909           | 8367                 | 30.1              | 69.9            | 29.11 | 31.07 | 2435.56   | 2599.97   | Significant               | 3.38e-34         |
| 4                     | 1642   | 3924 | 4290    | 9856            | 5566                 | 29.5              | 70.5            | 28.32 | 30.71 | 1576.12   | 1709.46   | Significant               | 5.96e-18         |
| 5                     | 1083   | 2685 | 3080    | 6848            | 3768                 | 28.7              | 71.3            | 27.32 | 30.21 | 1029.38   | 1138.25   | Significant               | 3.27e-08         |
| 6                     | 803    | 2038 | 2420    | 5261            | 2841                 | 28.3              | 71.7            | 26.64 | 29.95 | 756.81    | 850.86    | Significant               | 2.49e-04         |
| 7                     | 584    | 1615 | 1964    | 4163            | 2199                 | 26.6              | 73.4            | 24.75 | 28.44 | 544.32    | 625.47    |                           | 1.00e+00         |
| 8                     | 403    | 1373 | 1539    | 3315            | 1776                 | 22.7              | 77.3            | 20.80 | 24.70 | 369.46    | 438.64    |                           | 1.00e+00         |
| 9                     | 373    | 1028 | 1402    | 2803            | 1401                 | 26.6              | 73.4            | 24.37 | 29.00 | 341.49    | 406.30    |                           | 1.00e+00         |
| 10                    | 281    | 848  | 1115    | 2244            | 1129                 | 24.9              | 75.1            | 22.45 | 27.50 | 253.50    | 310.42    |                           | 1.00e+00         |
| 11                    | 204    | 750  | 983     | 1937            | 954                  | 21.4              | 78.6            | 18.90 | 24.10 | 180.28    | 229.91    |                           | 1.00e+00         |
| 12                    | 185    | 639  | 846     | 1670            | 824                  | 22.5              | 77.5            | 19.73 | 25.43 | 162.58    | 209.52    |                           | 1.00e+00         |
| 13                    | 161    | 564  | 772     | 1497            | 725                  | 22.2              | 77.8            | 19.33 | 25.38 | 140.13    | 183.99    |                           | 1.00e+00         |
| 14                    | 144    | 455  | 685     | 1284            | 599                  | 24.0              | 76.0            | 20.79 | 27.62 | 124.51    | 165.47    |                           | 1.00e+00         |
| 15                    | 111    | 436  | 592     | 1139            | 547                  | 20.3              | 79.7            | 17.13 | 23.87 | 93.69     | 130.57    |                           | 1.00e+00         |
| 16                    | 93     | 372  | 570     | 1035            | 465                  | 20.0              | 80.0            | 16.61 | 23.88 | 77.23     | 111.06    |                           | 1.00e+00         |
| 17                    | 96     | 341  | 467     | 904             | 437                  | 22.0              | 78.0            | 18.33 | 26.09 | 80.11     | 114.02    |                           | 1.00e+00         |
| 18                    | 84     | 279  | 460     | 823             | 363                  | 23.1              | 76.9            | 19.09 | 27.76 | 69.29     | 100.75    |                           | 1.00e+00         |
| 19                    | 75     | 247  | 411     | 733             | 322                  | 23.3              | 76.7            | 19.00 | 28.22 | 61.17     | 90.86     |                           | 1.00e+00         |
| 20                    | 77     | 229  | 349     | 655             | 306                  | 25.2              | 74.8            | 20.62 | 30.32 | 63.10     | 92.79     |                           | 1.00e+00         |
| 21                    | 47     | 231  | 327     | 605             | 278                  | 16.9              | 83.1            | 12.94 | 21.78 | 35.96     | 60.55     |                           | 1.00e+00         |
| 22                    | 58     | 187  | 344     | 589             | 245                  | 23.7              | 76.3            | 18.77 | 29.39 | 45.98     | 72.01     |                           | 1.00e+00         |
| 23                    | 44     | 192  | 316     | 552             | 236                  | 18.6              | 81.4            | 14.17 | 24.13 | 33.43     | 56.94     |                           | 1.00e+00         |
| 24                    | 41     | 145  | 276     | 462             | 186                  | 22.0              | 78.0            | 16.66 | 28.56 | 30.98     | 53.12     |                           | 1.00e+00         |
| 25                    | 31     | 158  | 261     | 450             | 189                  | 16.4              | 83.6            | 11.76 | 22.38 | 22.23     | 42.30     |                           | 1.00e+00         |
| 26                    | 24     | 130  | 236     | 390             | 154                  | 15.6              | 84.4            | 10.64 | 22.20 | 16.39     | 34.19     |                           | 1.00e+00         |
| 27                    | 30     | 128  | 251     | 409             | 158                  | 19.0              | 81.0            | 13.59 | 25.85 | 21.48     | 40.85     |                           | 1.00e+00         |
| 28                    | 34     | 110  | 202     | 346             | 144                  | 23.6              | 76.4            | 17.38 | 31.21 | 25.03     | 44.94     |                           | 1.00e+00         |
| 29                    | 24     | 101  | 184     | 309             | 125                  | 19.2              | 80.8            | 13.20 | 27.04 | 16.50     | 33.80     |                           | 1.00e+00         |
| 30                    | 35     | 71   | 188     | 294             | 106                  | 33.0              | 67.0            | 24.78 | 42.45 | 26.27     | 44.99     |                           | 1.00e+00         |

<sup>6</sup> Significance calculated compared to baseline of average for original submissions from female corresponding authors (23.9%)

**Figure and Table B2b: Breakdown of first author gender with number of submissions (numbers greater than 30 have been omitted)**

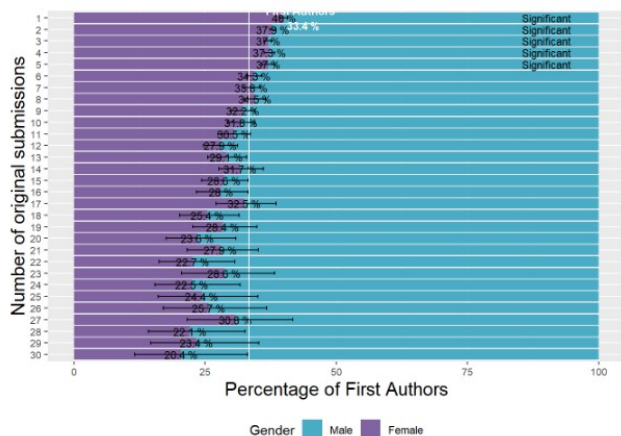

| Number of submissions | Female | Male  | Unknown | Total For Level | Total Gender Deduced | Female Percentage | Male Percentage | LCI   | UCI   | LCI Count | UCI Count | Significance <sup>7</sup> | Adjusted P-Value |
|-----------------------|--------|-------|---------|-----------------|----------------------|-------------------|-----------------|-------|-------|-----------|-----------|---------------------------|------------------|
| 1                     | 8425   | 12625 | 22995   | 44045           | 21050                | 40.0              | 60.0            | 39.36 | 40.69 | 8286.07   | 8564.69   | Significant               | 2.12e-85         |
| 2                     | 11327  | 18548 | 26287   | 56162           | 29875                | 37.9              | 62.1            | 37.37 | 38.47 | 11163.11  | 11491.82  | Significant               | 8.33e-56         |
| 3                     | 6283   | 10719 | 16545   | 33547           | 17002                | 37.0              | 63.0            | 36.23 | 37.68 | 6160.16   | 6406.84   | Significant               | 3.30e-18         |
| 4                     | 3674   | 6184  | 10424   | 20282           | 9858                 | 37.3              | 62.7            | 36.32 | 38.23 | 3580.41   | 3768.57   | Significant               | 7.15e-12         |
| 5                     | 2359   | 4010  | 7221    | 13590           | 6369                 | 37.0              | 63.0            | 35.86 | 38.23 | 2283.98   | 2435.01   | Significant               | 6.74e-06         |
| 6                     | 1450   | 2779  | 5132    | 9361            | 4229                 | 34.3              | 65.7            | 32.87 | 35.73 | 1390.12   | 1511.08   |                           | 1.00e+00         |
| 7                     | 983    | 1927  | 3825    | 6735            | 2910                 | 33.8              | 66.2            | 32.08 | 35.52 | 933.64    | 1033.60   |                           | 1.00e+00         |
| 8                     | 699    | 1329  | 2864    | 4892            | 2028                 | 34.5              | 65.5            | 32.43 | 36.56 | 657.68    | 741.51    |                           | 1.00e+00         |
| 9                     | 505    | 1064  | 2314    | 3883            | 1569                 | 32.2              | 67.8            | 29.92 | 34.54 | 469.44    | 541.92    |                           | 1.00e+00         |
| 10                    | 380    | 814   | 1705    | 2899            | 1194                 | 31.8              | 68.2            | 29.24 | 34.52 | 349.18    | 412.21    |                           | 1.00e+00         |
| 11                    | 264    | 602   | 1410    | 2276            | 866                  | 30.5              | 69.5            | 27.51 | 33.63 | 238.23    | 291.26    |                           | 1.00e+00         |
| 12                    | 204    | 528   | 1145    | 1877            | 732                  | 27.9              | 72.1            | 24.74 | 31.23 | 181.10    | 228.59    |                           | 1.00e+00         |
| 13                    | 171    | 417   | 989     | 1577            | 588                  | 29.1              | 70.9            | 25.55 | 32.88 | 150.26    | 193.34    |                           | 1.00e+00         |
| 14                    | 146    | 314   | 722     | 1182            | 460                  | 31.7              | 68.3            | 27.65 | 36.13 | 127.19    | 166.21    |                           | 1.00e+00         |
| 15                    | 115    | 287   | 625     | 1027            | 402                  | 28.6              | 71.4            | 24.40 | 33.22 | 98.10     | 133.53    |                           | 1.00e+00         |
| 16                    | 90     | 231   | 559     | 880             | 321                  | 28.0              | 72.0            | 23.40 | 33.20 | 75.11     | 106.56    |                           | 1.00e+00         |
| 17                    | 83     | 172   | 451     | 706             | 255                  | 32.5              | 67.5            | 27.09 | 38.53 | 69.07     | 98.25     |                           | 1.00e+00         |
| 18                    | 58     | 170   | 400     | 628             | 228                  | 25.4              | 74.6            | 20.21 | 31.48 | 46.08     | 71.78     |                           | 1.00e+00         |
| 19                    | 59     | 149   | 341     | 549             | 208                  | 28.4              | 71.6            | 22.66 | 34.85 | 47.14     | 72.49     |                           | 1.00e+00         |
| 20                    | 37     | 120   | 297     | 454             | 157                  | 23.6              | 76.4            | 17.58 | 30.82 | 27.60     | 48.38     |                           | 1.00e+00         |
| 21                    | 46     | 119   | 232     | 397             | 165                  | 27.9              | 72.1            | 21.58 | 35.18 | 35.61     | 58.05     |                           | 1.00e+00         |
| 22                    | 29     | 99    | 256     | 384             | 128                  | 22.7              | 77.3            | 16.22 | 30.69 | 20.76     | 39.28     |                           | 1.00e+00         |
| 23                    | 28     | 70    | 223     | 321             | 98                   | 28.6              | 71.4            | 20.53 | 38.23 | 20.12     | 37.46     |                           | 1.00e+00         |
| 24                    | 23     | 79    | 188     | 290             | 102                  | 22.5              | 77.5            | 15.46 | 31.63 | 15.77     | 32.26     |                           | 1.00e+00         |
| 25                    | 19     | 59    | 164     | 242             | 78                   | 24.4              | 75.6            | 16.11 | 35.01 | 12.57     | 27.31     |                           | 1.00e+00         |
| 26                    | 19     | 55    | 136     | 210             | 74                   | 25.7              | 74.3            | 17.03 | 36.72 | 12.60     | 27.18     |                           | 1.00e+00         |
| 27                    | 24     | 54    | 134     | 212             | 78                   | 30.8              | 69.2            | 21.59 | 41.75 | 16.84     | 32.57     |                           | 1.00e+00         |
| 28                    | 17     | 60    | 120     | 197             | 77                   | 22.1              | 77.9            | 14.18 | 32.63 | 10.91     | 25.13     |                           | 1.00e+00         |
| 29                    | 15     | 49    | 108     | 172             | 64                   | 23.4              | 76.6            | 14.65 | 35.24 | 9.37      | 22.55     |                           | 1.00e+00         |
| 30                    | 11     | 43    | 100     | 154             | 54                   | 20.4              | 79.6            | 11.60 | 33.07 | 6.27      | 17.86     |                           | 1.00e+00         |

<sup>7</sup> Significance calculated compared to baseline of average for original submissions from female first authors (33.4%)

**Table B3a (for Figures 4): Breakdown of submissions with corresponding author country and gender (only top 20 countries have been included)**

| Country        | Female | Male  | Unknown | Total For Level | Total Gender Deduced | Female Percentage | Male Percentage | LCI   | UCI   | LCI Count | UCI Count | Significance <sup>8</sup> | Adjusted P-Value |
|----------------|--------|-------|---------|-----------------|----------------------|-------------------|-----------------|-------|-------|-----------|-----------|---------------------------|------------------|
| China          | 14058  | 36449 | 240233  | 290740          | 50507                | 27.8              | 72.2            | 27.44 | 28.23 | 13861.44  | 14256.26  | Significant               | 1.62e-87         |
| India          | 7728   | 23340 | 45072   | 76140           | 31068                | 24.9              | 75.1            | 24.40 | 25.36 | 7579.63   | 7878.30   |                           | 1.00e+00         |
| USA            | 7703   | 29274 | 19936   | 56913           | 36977                | 20.8              | 79.2            | 20.42 | 21.25 | 7551.06   | 7857.18   | Significant               | 3.14e-40         |
| South Korea    | 900    | 6304  | 21220   | 28424           | 7204                 | 12.5              | 87.5            | 11.75 | 13.28 | 846.41    | 956.47    | Significant               | 4.94e-127        |
| Japan          | 1501   | 12885 | 9758    | 24144           | 14386                | 10.4              | 89.6            | 9.94  | 10.94 | 1430.63   | 1574.41   | Significant               | 7.11e-320        |
| United Kingdom | 3113   | 14175 | 3569    | 20857           | 17288                | 18.0              | 82.0            | 17.44 | 18.59 | 3015.20   | 3213.25   | Significant               | 3.54e-74         |
| Germany        | 2909   | 13691 | 4139    | 20739           | 16600                | 17.5              | 82.5            | 16.95 | 18.11 | 2814.24   | 3006.26   | Significant               | 3.52e-84         |
| Ireland        | 1626   | 12572 | 5679    | 19877           | 14198                | 11.5              | 88.5            | 10.94 | 11.99 | 1553.09   | 1701.87   | Significant               | 9.65e-306        |
| France         | 3209   | 8561  | 2853    | 14623           | 11770                | 27.3              | 72.7            | 26.47 | 28.08 | 3115.19   | 3304.56   | Significant               | 3.93e-13         |
| Spain          | 3317   | 8431  | 2831    | 14579           | 11748                | 28.2              | 71.8            | 27.43 | 29.06 | 3222.22   | 3413.45   | Significant               | 3.78e-23         |
| Taiwan         | 367    | 937   | 11162   | 12466           | 1304                 | 28.1              | 71.9            | 25.77 | 30.65 | 336.03    | 399.64    |                           | 5.20e-01         |
| Italy          | 4384   | 6032  | 978     | 11394           | 10416                | 42.1              | 57.9            | 41.14 | 43.04 | 4285.57   | 4483.04   | Significant               | 5.15e-320        |
| Australia      | 1352   | 5647  | 3673    | 10672           | 6999                 | 19.3              | 80.7            | 18.41 | 20.26 | 1288.44   | 1417.91   | Significant               | 2.73e-16         |
| Canada         | 1218   | 5274  | 2967    | 9459            | 6492                 | 18.8              | 81.2            | 17.83 | 19.73 | 1157.54   | 1280.86   | Significant               | 1.57e-19         |
| Singapore      | 476    | 2185  | 5412    | 8073            | 2661                 | 17.9              | 82.1            | 16.48 | 19.39 | 438.47    | 515.99    | Significant               | 1.79e-10         |
| Brazil         | 1659   | 3807  | 1886    | 7352            | 5466                 | 30.4              | 69.6            | 29.15 | 31.58 | 1593.15   | 1726.36   | Significant               | 7.33e-24         |
| Poland         | 2481   | 3301  | 777     | 6559            | 5782                 | 42.9              | 57.1            | 41.64 | 44.19 | 2407.53   | 2555.01   | Significant               | 5.62e-217        |
| Russia         | 1261   | 3582  | 578     | 5421            | 4843                 | 26.0              | 74.0            | 24.82 | 27.29 | 1202.07   | 1321.77   |                           | 1.00e+00         |
| Turkey         | 865    | 2203  | 1487    | 4555            | 3068                 | 28.2              | 71.8            | 26.63 | 29.81 | 817.01    | 914.67    | Significant               | 1.41e-04         |
| Switzerland    | 769    | 2617  | 768     | 4154            | 3386                 | 22.7              | 77.3            | 21.33 | 24.15 | 722.27    | 817.83    |                           | 1.00e+00         |

<sup>8</sup> Significance calculated compared to baseline of average for submissions from female corresponding authors (23.9%)



**Table B3b (for Figure 5): Breakdown of submissions by corresponding author gender calculated by gender-guesser method with continent of corresponding author address**

| Country  | Female | Male  | Unknown | Total For Level | Total Gender Deduced | Female Percentage | Male Percentage | LCI   | UCI   | LCI Count | UCI Count | Significance <sup>9</sup> | Adjusted P-Value |
|----------|--------|-------|---------|-----------------|----------------------|-------------------|-----------------|-------|-------|-----------|-----------|---------------------------|------------------|
| Asia     | 15470  | 59414 | 394005  | 468889          | 74884                | 20.7              | 79.3            | 20.37 | 20.95 | 15253.99  | 15688.27  | Significant               | 2.59e-94         |
| Europe   | 28446  | 85022 | 31662   | 145130          | 113468               | 25.1              | 74.9            | 24.82 | 25.32 | 28160.81  | 28733.10  | Significant               | 4.49e-15         |
| Americas | 9788   | 35885 | 33681   | 79354           | 45673                | 21.4              | 78.6            | 21.06 | 21.81 | 9617.22   | 9960.98   | Significant               | 2.54e-31         |
| Oceania  | 1428   | 5178  | 5019    | 11625           | 6606                 | 21.6              | 78.4            | 20.64 | 22.63 | 1363.52   | 1494.66   |                           | 7.61e-02         |
| Africa   | 1489   | 3593  | 3166    | 8248            | 5082                 | 29.3              | 70.7            | 28.06 | 30.57 | 1426.22   | 1553.37   | Significant               | 6.21e-15         |
| Other    | 2      | 4     | 5       | 11              | 6                    | 33.3              | 66.7            | 9.25  | 70.43 | 0.56      | 4.23      |                           | 1.00e+00         |

**Table B3c (for Figure 5): Breakdown of submissions by corresponding author gender calculated by ONS method with continent of corresponding author address**

| Country  | Female | Male  | Unknown | Total For Level | Total Gender Deduced | Female Percentage | Male Percentage | LCI   | UCI   | LCI Count | UCI Count | Significance <sup>10</sup> | Adjusted P-Value |
|----------|--------|-------|---------|-----------------|----------------------|-------------------|-----------------|-------|-------|-----------|-----------|----------------------------|------------------|
| Asia     | 29760  | 96740 | 342693  | 469193          | 126500               | 23.5              | 76.5            | 23.29 | 23.76 | 29465.34  | 30056.70  |                            | 1.00e+00         |
| Europe   | 28719  | 86601 | 29811   | 145131          | 115320               | 24.9              | 75.1            | 24.65 | 25.15 | 28432.13  | 29007.80  | Significant                | 2.07e-10         |
| Americas | 11937  | 41657 | 25763   | 79357           | 53594                | 22.3              | 77.7            | 21.92 | 22.63 | 11749.27  | 12126.86  | Significant                | 3.01e-14         |
| Oceania  | 1579   | 6193  | 3853    | 11625           | 7772                 | 20.3              | 79.7            | 19.44 | 21.23 | 1510.62   | 1649.66   | Significant                | 3.86e-10         |
| Africa   | 1881   | 3748  | 2618    | 8247            | 5629                 | 33.4              | 66.6            | 32.20 | 34.66 | 1812.29   | 1950.98   | Significant                | 1.21e-54         |
| Other    | 2      | 5     | 6       | 13              | 7                    | 28.6              | 71.4            | 7.56  | 64.76 | 0.53      | 4.53      |                            | 1.00e+00         |

<sup>9</sup> Significance calculated compared to baseline of average for submissions from female corresponding authors calculated by gender-guesser(23.1%)

<sup>10</sup> Significance calculated compared to baseline of average for submissions from female corresponding authors calculated by ONS method (23.9%)

**Table B4a (for Figure 6): Breakdown of submissions by corresponding author gender and number of authors**

| Number of authors | Female | Male  | Unknown | Total For Level | Total Gender Deduced | Female Percentage | Male Percentage | LCI   | UCI   | LCI Count | UCI Count | Significance <sup>11</sup> | Adjusted P-Value |
|-------------------|--------|-------|---------|-----------------|----------------------|-------------------|-----------------|-------|-------|-----------|-----------|----------------------------|------------------|
| 1                 | 1554   | 6365  | 7313    | 15232           | 7919                 | 19.6              | 80.4            | 18.76 | 20.51 | 1485.89   | 1624.44   | Significant                | 6.33e-16         |
| 2                 | 7388   | 25482 | 30251   | 63121           | 32870                | 22.5              | 77.5            | 22.03 | 22.93 | 7240.73   | 7537.39   | Significant                | 3.81e-05         |
| 3                 | 10768  | 36912 | 48264   | 95944           | 47680                | 22.6              | 77.4            | 22.21 | 22.96 | 10590.10  | 10948.00  | Significant                | 5.87e-07         |
| 4                 | 12457  | 40170 | 62075   | 114702          | 52627                | 23.7              | 76.3            | 23.31 | 24.04 | 12266.90  | 12649.13  |                            | 1.00e+00         |
| 5                 | 11707  | 36686 | 69013   | 117406          | 48393                | 24.2              | 75.8            | 23.81 | 24.58 | 11523.35  | 11892.63  |                            | 1.00e+00         |
| 6                 | 9861   | 30469 | 64817   | 105147          | 40330                | 24.5              | 75.5            | 24.03 | 24.87 | 9692.81   | 10031.15  |                            | 1.00e+00         |
| 7                 | 7571   | 21849 | 48058   | 77478           | 29420                | 25.7              | 74.3            | 25.24 | 26.24 | 7424.97   | 7718.90   | Significant                | 7.57e-09         |
| 8                 | 5101   | 14970 | 32349   | 52420           | 20071                | 25.4              | 74.6            | 24.82 | 26.02 | 4981.06   | 5222.83   | Significant                | 1.16e-02         |
| 9                 | 3145   | 9951  | 22079   | 35175           | 13096                | 24.0              | 76.0            | 23.29 | 24.75 | 3050.19   | 3241.81   |                            | 1.00e+00         |
| 10                | 2314   | 6349  | 13541   | 22204           | 8663                 | 26.7              | 73.3            | 25.79 | 27.65 | 2234.19   | 2395.60   | Significant                | 1.17e-05         |
| 11                | 950    | 2790  | 3688    | 7428            | 3740                 | 25.4              | 74.6            | 24.03 | 26.82 | 898.78    | 1003.11   |                            | 1.00e+00         |
| 12                | 638    | 1779  | 2264    | 4681            | 2417                 | 26.4              | 73.6            | 24.68 | 28.19 | 596.45    | 681.36    |                            | 1.00e+00         |
| 13                | 335    | 990   | 1295    | 2620            | 1325                 | 25.3              | 74.7            | 23.02 | 27.69 | 304.95    | 366.94    |                            | 1.00e+00         |
| 14                | 191    | 601   | 605     | 1397            | 792                  | 24.1              | 75.9            | 21.26 | 27.22 | 168.41    | 215.57    |                            | 1.00e+00         |
| 15                | 117    | 364   | 377     | 858             | 481                  | 24.3              | 75.7            | 20.70 | 28.36 | 99.56     | 136.40    |                            | 1.00e+00         |
| 16                | 74     | 198   | 146     | 418             | 272                  | 27.2              | 72.8            | 22.25 | 32.79 | 60.53     | 89.20     |                            | 1.00e+00         |
| 17                | 48     | 120   | 133     | 301             | 168                  | 28.6              | 71.4            | 22.26 | 35.84 | 37.40     | 60.21     |                            | 1.00e+00         |
| 18                | 21     | 88    | 81      | 190             | 109                  | 19.3              | 80.7            | 12.89 | 27.74 | 14.05     | 30.23     |                            | 1.00e+00         |
| 19                | 11     | 46    | 46      | 103             | 57                   | 19.3              | 80.7            | 10.96 | 31.51 | 6.25      | 17.96     |                            | 1.00e+00         |
| 20                | 13     | 25    | 32      | 70              | 38                   | 34.2              | 65.8            | 21.15 | 50.17 | 8.04      | 19.07     |                            | 1.00e+00         |
| 21                | 16     | 14    | 22      | 52              | 30                   | 53.3              | 46.7            | 36.14 | 69.77 | 10.84     | 20.93     | Significant                | 2.27e-02         |
| 22                | 10     | 28    | 21      | 59              | 38                   | 26.3              | 73.7            | 14.81 | 42.17 | 5.63      | 16.02     |                            | 1.00e+00         |
| 23                | 4      | 6     | 3       | 13              | 10                   | 40.0              | 60.0            | 16.71 | 68.84 | 1.67      | 6.88      |                            | 1.00e+00         |
| 24                | 0      | 8     | 6       | 14              | 8                    | 0.0               | 100.0           | -4.78 | 37.22 | NaN       | NaN       |                            | 1.00e+00         |
| 25                | 0      | 11    | 1       | 12              | 11                   | 0.0               | 100.0           | -4.14 | 30.02 | NaN       | NaN       |                            | 8.51e-01         |
| 26                | 0      | 6     | 1       | 7               | 6                    | 0.0               | 100.0           | -5.24 | 44.28 | NaN       | NaN       |                            | 1.00e+00         |
| 27                | 1      | 12    | 3       | 16              | 13                   | 7.7               | 92.3            | -0.74 | 35.42 | -0.10     | 4.61      |                            | 1.00e+00         |
| 28                | 0      | 2     | 2       | 4               | 2                    | 0.0               | 100.0           | -5.22 | 70.98 | NaN       | NaN       |                            | 1.00e+00         |
| 29                | 1      | 2     | 2       | 5               | 3                    | 33.3              | 66.7            | 5.63  | 79.76 | 0.17      | 2.39      |                            | 1.00e+00         |
| 30                | 0      | 2     | 1       | 3               | 2                    | 0.0               | 100.0           | -5.22 | 70.98 | NaN       | NaN       |                            | 1.00e+00         |

<sup>11</sup> Significance calculated compared to baseline of average for original submissions from female corresponding authors (23.9%)

**Table B4b: Breakdown of submissions by first author gender and corresponding author gender**

| First author gender | Female | Male  | Unknown | Total For Level | Total Gender Deduced | Female Percentage | Male Percentage | LCI   | UCI   | LCI Count | UCI Count | Significance <sup>1,2</sup> | Adjusted P-Value |
|---------------------|--------|-------|---------|-----------------|----------------------|-------------------|-----------------|-------|-------|-----------|-----------|-----------------------------|------------------|
| F                   | 12768  | 33298 | 30127   | 76193           | 46066                | 27.7              | 72.3            | 27.31 | 28.13 | 12580.57  | 12957.14  | Significant                 | 7.30e-75         |
| M                   | 13862  | 58424 | 55522   | 127808          | 72286                | 19.2              | 80.8            | 18.89 | 19.47 | 13655.73  | 14070.64  | Significant                 | 9.61e-200        |
| U                   | 17598  | 60957 | 200235  | 278790          | 78555                | 22.4              | 77.6            | 22.11 | 22.70 | 17370.02  | 17828.10  | Significant                 | 2.93e-18         |

---

<sup>12</sup> Significance calculated compared to baseline of average for original submissions from female corresponding authors (23.9%)

**Table B5a (for Figure 9): Breakdown of submissions by corresponding author gender and date**

| Date    | Female | Male  | Unknown | Total For Level | Total Gender Deduced | Female Percentage | Male Percentage | LCI   | UCI   | LCI Count | UCI Count | Significance <sup>13</sup> | Adjusted P-Value |
|---------|--------|-------|---------|-----------------|----------------------|-------------------|-----------------|-------|-------|-----------|-----------|----------------------------|------------------|
| 2014 Q1 | 2629   | 8169  | 13717   | 24515           | 10798                | 24.3              | 75.7            | 23.55 | 25.17 | 2542.58   | 2717.39   |                            | 1                |
| 2014 Q2 | 2283   | 7355  | 12248   | 21886           | 9638                 | 23.7              | 76.3            | 22.85 | 24.55 | 2202.21   | 2365.82   |                            | 1                |
| 2014 Q3 | 2210   | 6849  | 11707   | 20766           | 9059                 | 24.4              | 75.6            | 23.52 | 25.29 | 2130.87   | 2291.09   |                            | 1                |
| 2014 Q4 | 2571   | 8098  | 14425   | 25094           | 10669                | 24.1              | 75.9            | 23.30 | 24.92 | 2485.42   | 2658.57   |                            | 1                |
| 2015 Q1 | 3065   | 9820  | 17268   | 30153           | 12885                | 23.8              | 76.2            | 23.06 | 24.53 | 2971.28   | 3160.73   |                            | 1                |
| 2015 Q2 | 4023   | 13617 | 22747   | 40387           | 17640                | 22.8              | 77.2            | 22.19 | 23.43 | 3914.82   | 4133.27   |                            | 1                |
| 2015 Q3 | 4480   | 14471 | 24847   | 43798           | 18951                | 23.6              | 76.4            | 23.04 | 24.25 | 4366.38   | 4595.65   |                            | 1                |
| 2015 Q4 | 4419   | 14758 | 25859   | 45036           | 19177                | 23.0              | 77.0            | 22.45 | 23.64 | 4305.74   | 4534.33   |                            | 1                |
| 2016 Q1 | 4774   | 15061 | 25781   | 45616           | 19835                | 24.1              | 75.9            | 23.48 | 24.67 | 4656.99   | 4893.00   |                            | 1                |
| 2016 Q2 | 5194   | 16100 | 27735   | 49029           | 21294                | 24.4              | 75.6            | 23.82 | 24.97 | 5072.16   | 5317.80   |                            | 1                |
| 2016 Q3 | 5297   | 16397 | 28316   | 50010           | 21694                | 24.4              | 75.6            | 23.85 | 24.99 | 5173.97   | 5421.99   |                            | 1                |
| 2016 Q4 | 4593   | 14371 | 25057   | 44021           | 18964                | 24.2              | 75.8            | 23.62 | 24.83 | 4478.36   | 4709.62   |                            | 1                |
| 2017 Q1 | 3639   | 11443 | 19997   | 35079           | 15082                | 24.1              | 75.9            | 23.45 | 24.82 | 3537.01   | 3742.98   |                            | 1                |
| 2017 Q2 | 4660   | 14382 | 24009   | 43051           | 19042                | 24.5              | 75.5            | 23.87 | 25.09 | 4544.71   | 4777.25   |                            | 1                |
| 2017 Q3 | 4484   | 13826 | 24170   | 42480           | 18310                | 24.5              | 75.5            | 23.87 | 25.12 | 4370.94   | 4599.02   |                            | 1                |
| 2017 Q4 | 4319   | 13332 | 23928   | 41579           | 17651                | 24.5              | 75.5            | 23.84 | 25.11 | 4208.04   | 4431.92   |                            | 1                |
| 2018 Q1 | 4055   | 12692 | 22122   | 38869           | 16747                | 24.2              | 75.8            | 23.57 | 24.87 | 3947.34   | 4164.64   |                            | 1                |
| 2018 Q2 | 3403   | 10912 | 19020   | 33335           | 14315                | 23.8              | 76.2            | 23.08 | 24.48 | 3304.19   | 3503.83   |                            | 1                |

<sup>13</sup> Significance calculated compared to baseline of average for original submissions from female corresponding authors (23.9%)

**Figure and Table B5b: Breakdown of submissions by first author gender and date**

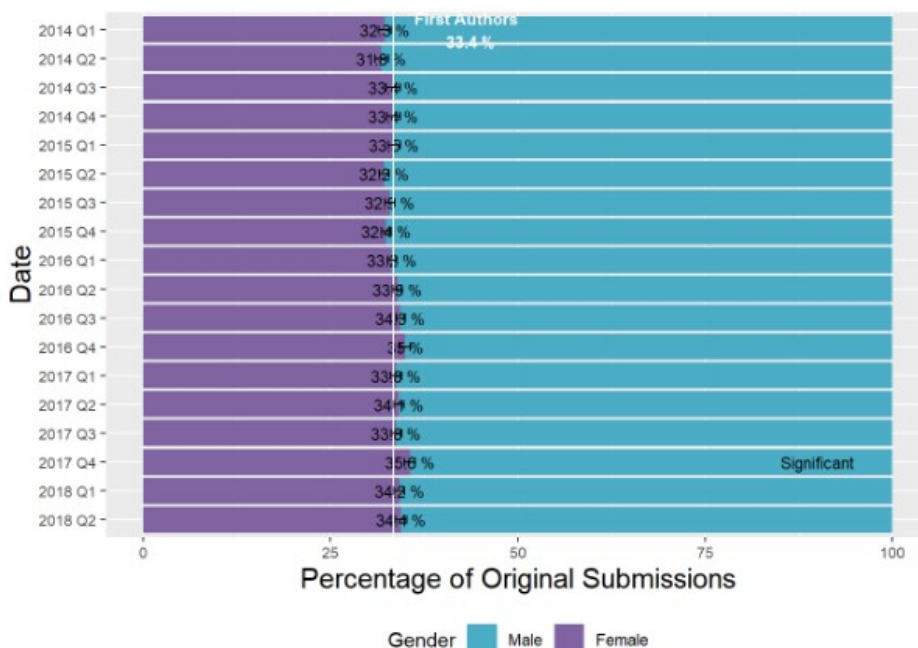

| Date    | Female | Male  | Unknown | Total For Level | Total Gender Deduced | Female Percentage | Male Percentage | LCI   | UCI   | LCI Count | UCI Count | Significance <sup>14</sup> | Adjusted P-Value |
|---------|--------|-------|---------|-----------------|----------------------|-------------------|-----------------|-------|-------|-----------|-----------|----------------------------|------------------|
| 2014 Q1 | 3549   | 7454  | 13512   | 24515           | 11003                | 32.3              | 67.7            | 31.39 | 33.13 | 3453.59   | 3645.77   |                            | 1.0000000        |
| 2014 Q2 | 3120   | 6680  | 12086   | 21886           | 9800                 | 31.8              | 68.2            | 30.92 | 32.77 | 3030.32   | 3211.07   |                            | 1.0000000        |
| 2014 Q3 | 3127   | 6244  | 11395   | 20766           | 9371                 | 33.4              | 66.6            | 32.42 | 34.33 | 3038.19   | 3217.09   |                            | 1.0000000        |
| 2014 Q4 | 3696   | 7363  | 14035   | 25094           | 11059                | 33.4              | 66.6            | 32.55 | 34.31 | 3599.42   | 3793.85   |                            | 1.0000000        |
| 2015 Q1 | 4452   | 8828  | 16873   | 30153           | 13280                | 33.5              | 66.5            | 32.73 | 34.33 | 4346.02   | 4559.25   |                            | 1.0000000        |
| 2015 Q2 | 5845   | 12324 | 22218   | 40387           | 18169                | 32.2              | 67.8            | 31.49 | 32.85 | 5722.28   | 5969.09   |                            | 1.0000000        |
| 2015 Q3 | 6307   | 12874 | 24617   | 43798           | 19181                | 32.9              | 67.1            | 32.22 | 33.55 | 6180.15   | 6435.17   |                            | 1.0000000        |
| 2015 Q4 | 6448   | 13442 | 25146   | 45036           | 19890                | 32.4              | 67.6            | 31.77 | 33.07 | 6319.30   | 6578.05   |                            | 1.0000000        |
| 2016 Q1 | 6825   | 13710 | 25081   | 45616           | 20535                | 33.2              | 66.8            | 32.59 | 33.88 | 6693.35   | 6957.94   |                            | 1.0000000        |
| 2016 Q2 | 7417   | 14464 | 27148   | 49029           | 21881                | 33.9              | 66.1            | 33.27 | 34.53 | 7280.39   | 7554.85   |                            | 1.0000000        |
| 2016 Q3 | 7586   | 14503 | 27921   | 50010           | 22089                | 34.3              | 65.7            | 33.72 | 34.97 | 7448.29   | 7724.92   |                            | 1.0000000        |
| 2016 Q4 | 6816   | 12683 | 24522   | 44021           | 19499                | 35.0              | 65.0            | 34.29 | 35.63 | 6686.09   | 6947.07   |                            | 0.0881163        |
| 2017 Q1 | 5234   | 10262 | 19583   | 35079           | 15496                | 33.8              | 66.2            | 33.04 | 34.53 | 5119.24   | 5350.00   |                            | 1.0000000        |
| 2017 Q2 | 6585   | 12730 | 23736   | 43051           | 19315                | 34.1              | 65.9            | 33.43 | 34.76 | 6456.50   | 6714.72   |                            | 1.0000000        |
| 2017 Q3 | 6301   | 12334 | 23845   | 42480           | 18635                | 33.8              | 66.2            | 33.14 | 34.50 | 6175.06   | 6428.18   |                            | 1.0000000        |
| 2017 Q4 | 6386   | 11562 | 23631   | 41579           | 17948                | 35.6              | 64.4            | 34.88 | 36.28 | 6260.85   | 6512.25   | Significant                | 0.0000133        |
| 2018 Q1 | 5795   | 11158 | 21916   | 38869           | 16953                | 34.2              | 65.8            | 33.47 | 34.90 | 5674.57   | 5916.64   |                            | 1.0000000        |
| 2018 Q2 | 4995   | 9532  | 18808   | 33335           | 14527                | 34.4              | 65.6            | 33.62 | 35.16 | 4883.40   | 5107.80   |                            | 1.0000000        |

<sup>14</sup> Significance calculated compared to baseline of average for original submissions from female first authors (33.4%)

**Table B6a (for Figure 9): Breakdown of submissions by corresponding author gender and chemistry sub-discipline**

| Chemistry sub-discipline       | Female | Male   | Unknown | Total For Level | Total Gender Deduced | Female Percentage | Male Percentage | LCI   | UCI   | LCI Count | UCI Count | Significance <sup>15</sup> | Adjusted P-Value |
|--------------------------------|--------|--------|---------|-----------------|----------------------|-------------------|-----------------|-------|-------|-----------|-----------|----------------------------|------------------|
| Analytical                     | 24652  | 65752  | 99884   | 190288          | 90404                | 27.3              | 72.7            | 26.98 | 27.56 | 24390.43  | 24915.31  | Significant                | 4.37e-116        |
| Biological                     | 15249  | 39531  | 51321   | 106101          | 54780                | 27.8              | 72.2            | 27.46 | 28.21 | 15044.25  | 15455.45  | Significant                | 2.65e-95         |
| Catalysis                      | 11161  | 41544  | 80591   | 133296          | 52705                | 21.2              | 78.8            | 20.83 | 21.53 | 10978.27  | 11345.94  | Significant                | 3.29e-45         |
| Chemical Biology and Medicinal | 16669  | 43408  | 59232   | 119309          | 60077                | 27.7              | 72.3            | 27.39 | 28.11 | 16454.76  | 16884.95  | Significant                | 6.56e-100        |
| Energy                         | 14020  | 53098  | 127353  | 194471          | 67118                | 20.9              | 79.1            | 20.58 | 21.20 | 13814.70  | 14227.53  | Significant                | 3.86e-72         |
| Environmental                  | 8892   | 20399  | 35067   | 64358           | 29291                | 30.4              | 69.6            | 29.83 | 30.89 | 8738.53   | 9046.98   | Significant                | 8.76e-136        |
| Food                           | 8347   | 15346  | 26582   | 50275           | 23693                | 35.2              | 64.8            | 34.62 | 35.84 | 8203.46   | 8491.67   | Significant                | 1.17e-319        |
| Inorganic                      | 8942   | 33967  | 37642   | 80551           | 42909                | 20.8              | 79.2            | 20.46 | 21.23 | 8778.22   | 9108.02   | Significant                | 7.87e-47         |
| Materials                      | 34889  | 115070 | 217713  | 367672          | 149959               | 23.3              | 76.7            | 23.05 | 23.48 | 34569.34  | 35210.72  | Significant                | 1.16e-03         |
| Miscellaneous                  | 287    | 934    | 740     | 1961            | 1221                 | 23.5              | 76.5            | 21.21 | 25.97 | 258.98    | 317.04    |                            | 1.00e+00         |
| Nanoscience                    | 26539  | 82777  | 190604  | 299920          | 109316               | 24.3              | 75.7            | 24.02 | 24.53 | 26262.14  | 26817.83  |                            | 1.00e+00         |
| Organic                        | 7992   | 35713  | 40993   | 84698           | 43705                | 18.3              | 81.7            | 17.93 | 18.65 | 7834.83   | 8151.61   | Significant                | 3.38e-172        |
| Physical                       | 20861  | 75290  | 104267  | 200418          | 96151                | 21.7              | 78.3            | 21.44 | 21.96 | 20611.59  | 21112.59  | Significant                | 4.98e-54         |

**Table B6b (for Figure 9): Breakdown of submissions by first author gender and journal chemistry sub-discipline**

| Chemistry sub-discipline       | Female | Male   | Unknown | Total For Level | Total Gender Deduced | Female Percentage | Male Percentage | LCI   | UCI   | LCI Count | UCI Count | Significance <sup>16</sup> | Adjusted P-Value |
|--------------------------------|--------|--------|---------|-----------------|----------------------|-------------------|-----------------|-------|-------|-----------|-----------|----------------------------|------------------|
| Analytical                     | 34230  | 57900  | 98158   | 190288          | 92130                | 37.2              | 62.8            | 36.84 | 37.47 | 33943     | 34518     | Significant                | 8.76e-122        |
| Biological                     | 22856  | 31759  | 51486   | 106101          | 54615                | 41.8              | 58.2            | 41.44 | 42.26 | 22630     | 23082     | Significant                | 2.70e-319        |
| Catalysis                      | 16917  | 37366  | 79013   | 133296          | 54283                | 31.2              | 68.8            | 30.78 | 31.56 | 16706     | 17129     | Significant                | 6.46e-24         |
| Chemical Biology and Medicinal | 24907  | 35481  | 58921   | 119309          | 60388                | 41.2              | 58.8            | 40.85 | 41.64 | 24670     | 25144     | Significant                | 5.97e-319        |
| Energy                         | 20009  | 49724  | 124738  | 194471          | 69733                | 28.7              | 71.3            | 28.36 | 29.03 | 19776     | 20244     | Significant                | 4.36e-152        |
| Environmental                  | 11937  | 18289  | 34132   | 64358           | 30226                | 39.5              | 60.5            | 38.94 | 40.04 | 11771     | 12104     | Significant                | 2.81e-104        |
| Food                           | 11374  | 13490  | 25411   | 50275           | 24864                | 45.7              | 54.3            | 45.13 | 46.36 | 11220     | 11528     | Significant                | 1.23e-319        |
| Inorganic                      | 13570  | 29293  | 37688   | 80551           | 42863                | 31.7              | 68.3            | 31.22 | 32.10 | 13382     | 13759     | Significant                | 7.28e-10         |
| Materials                      | 50411  | 102828 | 214433  | 367672          | 153239               | 32.9              | 67.1            | 32.66 | 33.13 | 50051     | 50772     |                            | 1.00e+00         |
| Miscellaneous                  | 417    | 781    | 763     | 1961            | 1198                 | 34.8              | 65.2            | 32.16 | 37.55 | 385       | 450       |                            | 1.00e+00         |
| Nanoscience                    | 38382  | 76077  | 185461  | 299920          | 114459               | 33.5              | 66.5            | 33.26 | 33.81 | 38069     | 38696     |                            | 1.00e+00         |
| Organic                        | 12717  | 31205  | 40776   | 84698           | 43922                | 29.0              | 71.0            | 28.53 | 29.38 | 12532     | 12904     | Significant                | 2.82e-84         |
| Physical                       | 28905  | 67542  | 103971  | 200418          | 96447                | 30.0              | 70.0            | 29.68 | 30.26 | 28627     | 29185     | Significant                | 5.54e-110        |

<sup>15</sup> Significance calculated compared to baseline of average for original submissions from female corresponding authors (23.9%)

<sup>16</sup> Significance calculated compared to baseline of average for original submissions from female first authors (33.4%)

**Table B6c (for Figure 10): Binomial GLM model of corresponding author gender of original submissions, chemistry sub-discipline and journal impact factor**

| Impact factor (IF 2017) | Chemistry sub-discipline (cats) | fit <sup>17</sup> | Standard Error | LCI   | UCI   | Population Size |
|-------------------------|---------------------------------|-------------------|----------------|-------|-------|-----------------|
| 1.6                     | Analytical                      | 0.327             | 0.013          | 0.323 | 0.330 | 26929           |
| 1.6                     | Biological                      | 0.337             | 0.018          | 0.332 | 0.342 | 11190           |
| 1.6                     | Catalysis                       | 0.231             | 0.021          | 0.226 | 0.235 | 10821           |
| 1.6                     | Chemical Biology and Medicinal  | 0.326             | 0.017          | 0.322 | 0.331 | 14891           |
| 1.6                     | Energy                          | 0.232             | 0.020          | 0.227 | 0.236 | 11746           |
| 1.6                     | Environmental                   | 0.330             | 0.019          | 0.325 | 0.336 | 13840           |
| 1.6                     | Food                            | 0.409             | 0.021          | 0.402 | 0.415 | 8806            |
| 1.6                     | Inorganic                       | 0.261             | 0.025          | 0.255 | 0.267 | 4082            |
| 1.6                     | Materials                       | 0.267             | 0.012          | 0.264 | 0.270 | 29024           |
| 1.6                     | Miscellaneous                   | 0.391             | 0.095          | 0.362 | 0.420 | 436             |
| 1.6                     | Nanoscience                     | 0.280             | 0.014          | 0.277 | 0.284 | 21212           |
| 1.6                     | Organic                         | 0.223             | 0.023          | 0.218 | 0.228 | 8540            |
| 1.6                     | Physical                        | 0.241             | 0.015          | 0.237 | 0.244 | 15317           |
| 10                      | Analytical                      | 0.185             | 0.024          | 0.180 | 0.190 | 5022            |
| 10                      | Biological                      | 0.197             | 0.028          | 0.192 | 0.203 | 4391            |
| 10                      | Catalysis                       | 0.196             | 0.023          | 0.191 | 0.201 | 7065            |
| 10                      | Chemical Biology and Medicinal  | 0.205             | 0.027          | 0.199 | 0.211 | 4420            |
| 10                      | Energy                          | 0.203             | 0.017          | 0.200 | 0.206 | 17427           |
| 10                      | Environmental                   | 0.261             | 0.037          | 0.252 | 0.270 | 1704            |
| 10                      | Food                            | 0.229             | 0.048          | 0.218 | 0.240 | 730             |
| 10                      | Inorganic                       | 0.143             | 0.037          | 0.137 | 0.149 | 4311            |
| 10                      | Materials                       | 0.203             | 0.014          | 0.200 | 0.206 | 20561           |
| 10                      | Miscellaneous                   | 0.039             | 0.257          | 0.028 | 0.053 | 111             |
| 10                      | Nanoscience                     | 0.214             | 0.015          | 0.211 | 0.217 | 14377           |
| 10                      | Organic                         | 0.135             | 0.032          | 0.131 | 0.140 | 4397            |
| 10                      | Physical                        | 0.192             | 0.021          | 0.188 | 0.196 | 9548            |
| 13                      | Analytical                      | 0.147             | 0.035          | 0.142 | 0.153 | 173             |
| 13                      | Biological                      | 0.159             | 0.042          | 0.152 | 0.167 | 102             |
| 13                      | Catalysis                       | 0.184             | 0.036          | 0.178 | 0.191 | 65              |
| 13                      | Chemical Biology and Medicinal  | 0.171             | 0.041          | 0.163 | 0.178 | 83              |
| 13                      | Energy                          | 0.193             | 0.026          | 0.188 | 0.199 | 451             |
| 13                      | Environmental                   | 0.238             | 0.054          | 0.226 | 0.251 | 51              |
| 13                      | Food                            | 0.180             | 0.070          | 0.167 | 0.194 | 28              |
| 13                      | Inorganic                       | 0.113             | 0.056          | 0.106 | 0.121 | 61              |
| 13                      | Materials                       | 0.183             | 0.021          | 0.179 | 0.187 | 1042            |
| 13                      | Miscellaneous                   | 0.015             | 0.365          | 0.009 | 0.023 | 0               |
| 13                      | Nanoscience                     | 0.193             | 0.024          | 0.189 | 0.198 | 793             |
| 13                      | Organic                         | 0.112             | 0.049          | 0.106 | 0.118 | 6               |
| 13                      | Physical                        | 0.176             | 0.031          | 0.170 | 0.182 | 413             |
| 4.5                     | Analytical                      | 0.272             | 0.008          | 0.270 | 0.274 | 34209           |
| 4.5                     | Biological                      | 0.283             | 0.010          | 0.281 | 0.286 | 22141           |
| 4.5                     | Catalysis                       | 0.218             | 0.012          | 0.216 | 0.221 | 18830           |
| 4.5                     | Chemical Biology and Medicinal  | 0.280             | 0.009          | 0.278 | 0.283 | 25333           |
| 4.5                     | Energy                          | 0.222             | 0.012          | 0.219 | 0.224 | 13224           |
| 4.5                     | Environmental                   | 0.305             | 0.013          | 0.302 | 0.309 | 7329            |
| 4.5                     | Food                            | 0.341             | 0.015          | 0.336 | 0.345 | 10044           |
| 4.5                     | Inorganic                       | 0.214             | 0.012          | 0.212 | 0.217 | 23890           |
| 4.5                     | Materials                       | 0.243             | 0.007          | 0.242 | 0.245 | 50249           |
| 4.5                     | Miscellaneous                   | 0.198             | 0.083          | 0.181 | 0.215 | 354             |
| 4.5                     | Nanoscience                     | 0.256             | 0.008          | 0.254 | 0.258 | 28101           |
| 4.5                     | Organic                         | 0.189             | 0.013          | 0.186 | 0.191 | 17181           |
| 4.5                     | Physical                        | 0.223             | 0.008          | 0.221 | 0.225 | 44398           |
| 7.4                     | Analytical                      | 0.223             | 0.014          | 0.220 | 0.226 | 21561           |
| 7.4                     | Biological                      | 0.235             | 0.017          | 0.231 | 0.239 | 13109           |
| 7.4                     | Catalysis                       | 0.206             | 0.014          | 0.203 | 0.209 | 13612           |
| 7.4                     | Chemical Biology and Medicinal  | 0.239             | 0.016          | 0.235 | 0.242 | 12592           |
| 7.4                     | Energy                          | 0.212             | 0.011          | 0.209 | 0.214 | 14507           |
| 7.4                     | Environmental                   | 0.281             | 0.024          | 0.275 | 0.287 | 4836            |
| 7.4                     | Food                            | 0.278             | 0.030          | 0.271 | 0.286 | 2900            |
| 7.4                     | Inorganic                       | 0.174             | 0.021          | 0.170 | 0.178 | 9603            |
| 7.4                     | Materials                       | 0.221             | 0.008          | 0.219 | 0.223 | 41470           |
| 7.4                     | Miscellaneous                   | 0.086             | 0.167          | 0.071 | 0.105 | 291             |
| 7.4                     | Nanoscience                     | 0.233             | 0.009          | 0.231 | 0.235 | 39499           |
| 7.4                     | Organic                         | 0.159             | 0.019          | 0.156 | 0.162 | 12878           |
| 7.4                     | Physical                        | 0.206             | 0.012          | 0.203 | 0.209 | 22417           |

<sup>17</sup> Model fit: CorrespondingAuthorGender ~cats \* IF2017

**Figure Table B6d: Binomial GLM model of first author gender of original submissions, chemistry sub-discipline and journal impact factor**

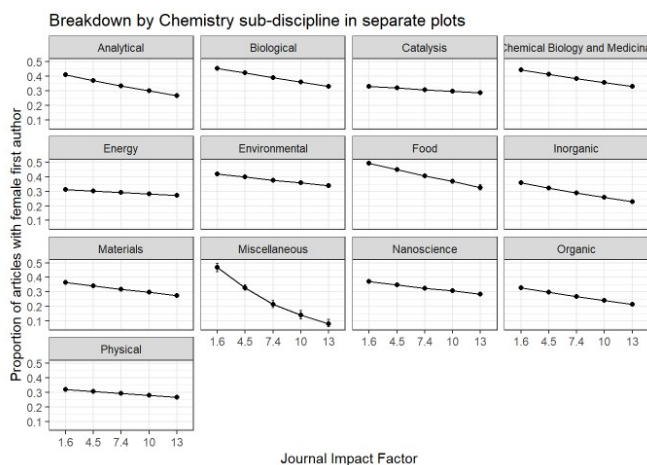

| Impact factor (IF 2017) | Chemistry sub-discipline (cats) | fit <sup>18</sup> | Standard Error | LCI   | UCI   | Population Size |
|-------------------------|---------------------------------|-------------------|----------------|-------|-------|-----------------|
| 1.6                     | Analytical                      | 0.409             | 0.012          | 0.406 | 0.413 | 28428           |
| 1.6                     | Biological                      | 0.456             | 0.017          | 0.451 | 0.461 | 11332           |
| 1.6                     | Catalysis                       | 0.330             | 0.018          | 0.325 | 0.336 | 11578           |
| 1.6                     | Chemical Biology and Medicinal  | 0.446             | 0.015          | 0.441 | 0.451 | 15188           |
| 1.6                     | Energy                          | 0.313             | 0.017          | 0.308 | 0.318 | 12657           |
| 1.6                     | Environmental                   | 0.419             | 0.018          | 0.413 | 0.425 | 14741           |
| 1.6                     | Food                            | 0.493             | 0.020          | 0.486 | 0.499 | 9286            |
| 1.6                     | Inorganic                       | 0.359             | 0.021          | 0.353 | 0.365 | 4358            |
| 1.6                     | Materials                       | 0.363             | 0.010          | 0.360 | 0.367 | 31543           |
| 1.6                     | Miscellaneous                   | 0.468             | 0.089          | 0.440 | 0.496 | 428             |
| 1.6                     | Nanoscience                     | 0.372             | 0.013          | 0.368 | 0.376 | 23373           |
| 1.6                     | Organic                         | 0.327             | 0.019          | 0.322 | 0.333 | 8762            |
| 1.6                     | Physical                        | 0.320             | 0.013          | 0.317 | 0.324 | 16085           |
| 10                      | Analytical                      | 0.301             | 0.021          | 0.295 | 0.306 | 4761            |
| 10                      | Biological                      | 0.362             | 0.024          | 0.355 | 0.369 | 4035            |
| 10                      | Catalysis                       | 0.298             | 0.020          | 0.292 | 0.303 | 7209            |
| 10                      | Chemical Biology and Medicinal  | 0.358             | 0.024          | 0.351 | 0.365 | 4173            |
| 10                      | Energy                          | 0.283             | 0.015          | 0.279 | 0.286 | 18363           |
| 10                      | Environmental                   | 0.360             | 0.034          | 0.350 | 0.370 | 1824            |
| 10                      | Food                            | 0.368             | 0.043          | 0.355 | 0.381 | 695             |
| 10                      | Inorganic                       | 0.258             | 0.031          | 0.251 | 0.266 | 4169            |
| 10                      | Materials                       | 0.297             | 0.012          | 0.294 | 0.301 | 20812           |
| 10                      | Miscellaneous                   | 0.139             | 0.188          | 0.112 | 0.170 | 106             |
| 10                      | Nanoscience                     | 0.306             | 0.013          | 0.303 | 0.310 | 15225           |
| 10                      | Organic                         | 0.242             | 0.026          | 0.236 | 0.248 | 4256            |
| 10                      | Physical                        | 0.279             | 0.018          | 0.274 | 0.284 | 9293            |
| 13                      | Analytical                      | 0.266             | 0.031          | 0.258 | 0.274 | 174             |
| 13                      | Biological                      | 0.330             | 0.037          | 0.320 | 0.341 | 104             |
| 13                      | Catalysis                       | 0.286             | 0.031          | 0.278 | 0.294 | 86              |
| 13                      | Chemical Biology and Medicinal  | 0.329             | 0.036          | 0.319 | 0.339 | 98              |
| 13                      | Energy                          | 0.272             | 0.023          | 0.267 | 0.278 | 460             |
| 13                      | Environmental                   | 0.339             | 0.049          | 0.325 | 0.354 | 48              |
| 13                      | Food                            | 0.327             | 0.063          | 0.309 | 0.345 | 27              |
| 13                      | Inorganic                       | 0.227             | 0.047          | 0.217 | 0.238 | 54              |
| 13                      | Materials                       | 0.276             | 0.019          | 0.271 | 0.280 | 1020            |
| 13                      | Miscellaneous                   | 0.081             | 0.270          | 0.059 | 0.111 | 0               |
| 13                      | Nanoscience                     | 0.284             | 0.021          | 0.279 | 0.290 | 784             |
| 13                      | Organic                         | 0.215             | 0.040          | 0.207 | 0.224 | 6               |
| 13                      | Physical                        | 0.265             | 0.028          | 0.258 | 0.272 | 428             |
| 4.5                     | Analytical                      | 0.370             | 0.007          | 0.368 | 0.372 | 34885           |
| 4.5                     | Biological                      | 0.423             | 0.009          | 0.420 | 0.426 | 22089           |
| 4.5                     | Catalysis                       | 0.319             | 0.010          | 0.316 | 0.322 | 19050           |
| 4.5                     | Chemical Biology and Medicinal  | 0.415             | 0.008          | 0.413 | 0.418 | 25511           |
| 4.5                     | Energy                          | 0.302             | 0.011          | 0.299 | 0.305 | 13468           |

<sup>18</sup> Model: FirstAuthorGender ~ Category \* ImpactFactor. ANOVA: Category is highly significant (p = 0.00e00); ImpactFactor is highly significant (p = 4.61e-263); Category\*ImpactFactor interactions are highly significant (p = 5.68e-34)



|     |                                |       |       |       |       |       |
|-----|--------------------------------|-------|-------|-------|-------|-------|
| 4.5 | Environmental                  | 0.398 | 0.012 | 0.394 | 0.402 | 7381  |
| 4.5 | Food                           | 0.449 | 0.014 | 0.444 | 0.453 | 10704 |
| 4.5 | Inorganic                      | 0.322 | 0.011 | 0.319 | 0.325 | 23972 |
| 4.5 | Materials                      | 0.340 | 0.006 | 0.338 | 0.342 | 50428 |
| 4.5 | Miscellaneous                  | 0.329 | 0.066 | 0.310 | 0.348 | 371   |
| 4.5 | Nanoscience                    | 0.349 | 0.007 | 0.347 | 0.351 | 29155 |
| 4.5 | Organic                        | 0.296 | 0.011 | 0.293 | 0.299 | 17082 |
| 4.5 | Physical                       | 0.306 | 0.007 | 0.304 | 0.308 | 44097 |
| 7.4 | Analytical                     | 0.333 | 0.013 | 0.329 | 0.336 | 21443 |
| 7.4 | Biological                     | 0.390 | 0.014 | 0.386 | 0.395 | 13213 |
| 7.4 | Catalysis                      | 0.308 | 0.012 | 0.304 | 0.311 | 13936 |
| 7.4 | Chemical Biology and Medicinal | 0.385 | 0.014 | 0.381 | 0.389 | 12648 |
| 7.4 | Energy                         | 0.292 | 0.010 | 0.289 | 0.294 | 15105 |
| 7.4 | Environmental                  | 0.378 | 0.022 | 0.371 | 0.384 | 4708  |
| 7.4 | Food                           | 0.406 | 0.027 | 0.397 | 0.414 | 2966  |
| 7.4 | Inorganic                      | 0.287 | 0.018 | 0.283 | 0.292 | 9391  |
| 7.4 | Materials                      | 0.317 | 0.007 | 0.315 | 0.319 | 42098 |
| 7.4 | Miscellaneous                  | 0.214 | 0.120 | 0.189 | 0.241 | 265   |
| 7.4 | Nanoscience                    | 0.326 | 0.008 | 0.324 | 0.328 | 40684 |
| 7.4 | Organic                        | 0.267 | 0.016 | 0.263 | 0.271 | 13126 |
| 7.4 | Physical                       | 0.291 | 0.011 | 0.288 | 0.294 | 22583 |

**Table C1 (for Figure 11): Breakdown of submissions by editor gender and journal editorial model**

| Journal editorial model                      | Female | Male   | Unknown | Total For Level | Total Gender Deduced | Female Percentage | Male Percentage | LCI   | UCI   | Significance <sup>19</sup> | Adjusted P-Value |
|----------------------------------------------|--------|--------|---------|-----------------|----------------------|-------------------|-----------------|-------|-------|----------------------------|------------------|
| AE                                           | 59236  | 106205 | 60171   | 225612          | 165441               | 35.8              | 64.2            | 35.57 | 36.04 | Significant                | 1.32e-316        |
| AE (with in-house pre-screening)             | 13107  | 22092  | 30778   | 65977           | 35199                | 37.2              | 62.8            | 36.73 | 37.74 | Significant                | 2.06e-29         |
| AE (with in-house pre-submission assessment) | 526    | 724    | 291     | 1541            | 1250                 | 42.1              | 57.9            | 39.37 | 44.84 |                            | 1.00e+00         |
| Hybrid                                       | 109186 | 98552  | 38723   | 246461          | 207738               | 52.6              | 47.4            | 52.34 | 52.77 | Significant                | 3.08e-318        |
| In-house                                     | 12740  | 10169  | 189     | 23098           | 22909                | 55.6              | 44.4            | 54.97 | 56.25 | Significant                | 1.13e-319        |
| Other                                        | 9      | 9      | 1       | 19              | 18                   | 50.0              | 50.0            | 29.03 | 70.97 |                            | 1.00e+00         |

<sup>19</sup> Significance calculated compared to baseline of average for unique editors (40.4%)

**Table C2a: Breakdown of submissions by corresponding author gender and whether the submission was rejected before peer review**

| Rejected without peer review? | Female | Male   | Unknown | Total For Level | Total Gender Deduced | Female Percentage | Male Percentage | LCI   | UCI   | LCI Count | UCI Count | Significance <sup>20</sup> | Adjusted P-Value |
|-------------------------------|--------|--------|---------|-----------------|----------------------|-------------------|-----------------|-------|-------|-----------|-----------|----------------------------|------------------|
| Peer reviewed                 | 51502  | 170106 | 263635  | 485243          | 221608               | 23.2              | 76.8            | 23.06 | 23.42 | 51113.33  | 51892.72  | Significant                | 6.15e-08         |
| Rejected without peer review  | 22804  | 66204  | 142857  | 231865          | 89008                | 25.6              | 74.4            | 25.33 | 25.91 | 22549.68  | 23060.19  | Significant                | 6.79e-28         |

**Table C2b: Breakdown of submissions by first author gender and whether the submission was rejected before peer review**

| Rejected without peer review? | Female | Male   | Unknown | Total For Level | Total Gender Deduced | Female Percentage | Male Percentage | LCI   | UCI   | LCI Count | UCI Count | Significance <sup>21</sup> | Adjusted P-Value |
|-------------------------------|--------|--------|---------|-----------------|----------------------|-------------------|-----------------|-------|-------|-----------|-----------|----------------------------|------------------|
| Peer reviewed                 | 74160  | 149565 | 261518  | 485243          | 223725               | 33.1              | 66.9            | 32.95 | 33.34 | 73724.24  | 74597.05  |                            | 1.0000           |
| Rejected without peer review  | 32111  | 61874  | 137880  | 231865          | 93985                | 34.2              | 65.8            | 33.86 | 34.47 | 31826.64  | 32396.57  |                            | 0.0631           |

<sup>20</sup> Significance calculated compared to baseline of average for original submissions from female corresponding authors (23.9%)

<sup>21</sup> Significance calculated compared to baseline of average for original submissions from female first authors (33.4%)

**Table C2c (for Figure 12): Binomial GLM model of proportion of submissions rejected without peer review and corresponding author gender controlled by whether the publication is single-authored or not**

| SingleAuthor | CorrespondingAuthorGender | fit <sup>22</sup> | Standard Error | LCI   | UCI   | Population Size |
|--------------|---------------------------|-------------------|----------------|-------|-------|-----------------|
| FALSE        | Female (F)                | 0.315             | 0.0080         | 0.313 | 0.317 | 72752           |
| FALSE        | Male (M)                  | 0.289             | 0.0046         | 0.287 | 0.290 | 229945          |
| TRUE         | Female (F)                | 0.430             | 0.0512         | 0.413 | 0.446 | 1554            |
| TRUE         | Male (M)                  | 0.398             | 0.0256         | 0.390 | 0.406 | 6365            |

---

<sup>22</sup> Model fit: RejectedWithoutPeerReview ~ SingleAuthor \* CorrespondingAuthorGender

**Table C3a (for Figure 13a): Binomial GLM model of proportion of original submissions rejected without peer review, corresponding author gender and editor gender**

| EditorGender | CorrespondingAuthorGender | fit <sup>23</sup> | Standard Error | LCI   | UCI   | Population Size |
|--------------|---------------------------|-------------------|----------------|-------|-------|-----------------|
| Female (F)   | Female (F)                | 0.337             | 0.015          | 0.332 | 0.341 | 20331           |
| Male (M)     | Female (F)                | 0.295             | 0.014          | 0.291 | 0.299 | 25453           |
| Female (F)   | Male (M)                  | 0.312             | 0.008          | 0.310 | 0.315 | 65252           |
| Male (M)     | Male (M)                  | 0.274             | 0.008          | 0.272 | 0.276 | 82357           |

---

<sup>23</sup> Model fit: RejectedWithoutPeerReview ~ CorrespondingAuthorGender \* EditorGender

**Table C3b (for Figure 13b): Binomial GLM model of proportion of original submissions rejected without peer review, corresponding author gender and journal editorial model**

| EditorialModelOfJournal                      | CorrespondingAuthorGender | fit <sup>24</sup> | Standard Error | LCI   | UCI   | Population Size |
|----------------------------------------------|---------------------------|-------------------|----------------|-------|-------|-----------------|
| Associate Editors (AE)                       | Female (F)                | 0.268             | 0.013          | 0.265 | 0.271 | 31104           |
| AE (with in-house pre-submission assessment) | Female (F)                | 0.128             | 0.199          | 0.102 | 0.159 | 227             |
| Hybrid                                       | Female (F)                | 0.314             | 0.012          | 0.311 | 0.317 | 31865           |
| In-house                                     | Female (F)                | 0.469             | 0.019          | 0.463 | 0.475 | 11108           |
| Associate Editors (AE)                       | Male (M)                  | 0.249             | 0.008          | 0.247 | 0.251 | 84128           |
| AE (with in-house pre-submission assessment) | Male (M)                  | 0.134             | 0.085          | 0.122 | 0.147 | 1188            |
| Hybrid                                       | Male (M)                  | 0.276             | 0.007          | 0.274 | 0.277 | 111024          |
| In-house                                     | Male (M)                  | 0.430             | 0.010          | 0.427 | 0.433 | 39947           |

---

<sup>24</sup> Model fit: RejectedWithoutPeerReview ~ CorrespondingAuthorGender \* EditorialModelOfJournal

**Table D1: Breakdown of reviewer invitations by reviewer gender and response**

| Reviewer response | Female | Male   | Unknown | Total For Level | Total Gender-Deduced | Female Percentage | Male Percentage | LCI   | UCI   | LCI Count | UCI Count | Significance <sup>25</sup> | Adjusted P-Value |
|-------------------|--------|--------|---------|-----------------|----------------------|-------------------|-----------------|-------|-------|-----------|-----------|----------------------------|------------------|
| Agreed            | 52663  | 192820 | 246056  | 491539          | 245483               | 21.5              | 78.5            | 21.29 | 21.62 | 52265     | 53063     | Significant                | 5.00e-10         |
| Declined          | 45149  | 162488 | 144593  | 352230          | 207637               | 21.7              | 78.3            | 21.57 | 21.92 | 44782     | 45518     | Significant                | 1.15e-20         |
| No Response       | 32640  | 133847 | 151768  | 318255          | 166487               | 19.6              | 80.4            | 19.42 | 19.80 | 32324     | 32959     | Significant                | 1.85e-28         |

---

<sup>25</sup> Significance calculated compared to average for reviewer invitations to female reviewers (20.8%)

**Table D2a: Breakdown of proportion of reviews by reviewer gender and corresponding author gender**

| Corresponding Author Gender | Female | Male   | Unknown | Total For Level | Total Gender-Deduced | Female Percentage | Male Percentage | LCI   | UCI   | LCI Count | UCI Count | Significance <sup>26</sup> | Adjusted P-Value |
|-----------------------------|--------|--------|---------|-----------------|----------------------|-------------------|-----------------|-------|-------|-----------|-----------|----------------------------|------------------|
| U                           | 47533  | 176006 | 270986  | 494525          | 223539               | 21.3              | 78.7            | 21.09 | 21.43 | 47155     | 47913     | Significant                | 1.59e-02         |
| M                           | 34620  | 144873 | 135091  | 314584          | 179493               | 19.3              | 80.7            | 19.11 | 19.47 | 34294     | 34949     | Significant                | 7.26e-52         |
| F                           | 12810  | 40868  | 41263   | 94941           | 53678                | 23.9              | 76.1            | 23.51 | 24.23 | 12617     | 13005     | Significant                | 1.54e-61         |

---

<sup>26</sup> Significance calculated compared to average for reviewer invitations to female reviewers (17.5%)



**Table D2b (for Figure 14a): Binomial GLM model of proportion of reviews by female reviewers, corresponding author gender and reviewer response**

| Response    | CorrespondingAuthorGender | fit <sup>27</sup> | Standard Error | LCI   | UCI   | Population Size |
|-------------|---------------------------|-------------------|----------------|-------|-------|-----------------|
| Agreed      | F                         | 0.259             | 0.014          | 0.255 | 0.263 | 23840           |
| Declined    | F                         | 0.249             | 0.0150         | 0.246 | 0.253 | 23730           |
| No Response | F                         | 0.220             | 0.021          | 0.215 | 0.224 | 13844           |
| Agreed      | M                         | 0.194             | 0.009          | 0.192 | 0.196 | 78844           |
| Declined    | M                         | 0.204             | 0.009          | 0.202 | 0.206 | 70737           |
| No Response | M                         | 0.183             | 0.012          | 0.181 | 0.185 | 48336           |

---

<sup>27</sup> Model fit: ReviewerGender ~ CorrespondingAuthorGender \* Response

**Table D2c (for Figure 14b): Binomial GLM model of proportion of invitations by female reviewers, corresponding author gender and editor gender**

| EditorGender | CorrespondingAuthorGender | fit <sup>28</sup> | Standard Error | LCI       | UCI       | Population Size |
|--------------|---------------------------|-------------------|----------------|-----------|-----------|-----------------|
| Female (F)   | Female (F)                | 0.256769          | 0.0207664      | 0.2517231 | 0.2618806 | 12151           |
| Male (M)     | Female (F)                | 0.2313658         | 0.0179076      | 0.2273098 | 0.2354722 | 17535           |
| Female (F)   | Male (M)                  | 0.2165862         | 0.0120788      | 0.2139712 | 0.2192243 | 40395           |
| Male (M)     | Male (M)                  | 0.1814619         | 0.0106878      | 0.1794363 | 0.1835052 | 58938           |

---

<sup>28</sup> Model fit: ReviewerGender ~ CorrespondingAuthorGender \* EditorGender

**Table D3a (for Figure 15a): Breakdown of reviews by reviewer gender and date**

| Date    | Female | Male  | Unknown | Total For Level | Total Gender Deduced | Female Percentage | Male Percentage | LCI   | UCI   | LCI Count | UCI Count | Significance <sup>29</sup> | Adjusted P-Value |
|---------|--------|-------|---------|-----------------|----------------------|-------------------|-----------------|-------|-------|-----------|-----------|----------------------------|------------------|
| 2014 Q1 | 4539   | 18682 | 19673   | 42894           | 23221                | 19.5              | 80.5            | 19.04 | 20.06 | 4421.73   | 4658.61   |                            | 0.0521991        |
| 2014 Q2 | 4093   | 16820 | 18692   | 39605           | 20913                | 19.6              | 80.4            | 19.04 | 20.11 | 3981.71   | 4206.62   |                            | 0.2218114        |
| 2014 Q3 | 3791   | 15480 | 17455   | 36726           | 19271                | 19.7              | 80.3            | 19.12 | 20.24 | 3684.01   | 3900.32   |                            | 1.0000000        |
| 2014 Q4 | 5008   | 18744 | 23632   | 47384           | 23752                | 21.1              | 78.9            | 20.57 | 21.61 | 4885.90   | 5132.32   |                            | 1.0000000        |
| 2015 Q1 | 4728   | 17875 | 23166   | 45769           | 22603                | 20.9              | 79.1            | 20.39 | 21.45 | 4609.27   | 4848.96   |                            | 1.0000000        |
| 2015 Q2 | 5502   | 20426 | 27151   | 53079           | 25928                | 21.2              | 78.8            | 20.73 | 21.72 | 5374.07   | 5632.14   |                            | 1.0000000        |
| 2015 Q3 | 5683   | 20582 | 27811   | 54076           | 26265                | 21.6              | 78.4            | 21.14 | 22.14 | 5553.29   | 5814.88   |                            | 1.0000000        |
| 2015 Q4 | 5886   | 21798 | 28587   | 56271           | 27684                | 21.3              | 78.7            | 20.78 | 21.75 | 5753.67   | 6020.53   |                            | 1.0000000        |
| 2016 Q1 | 5591   | 20531 | 25640   | 51762           | 26122                | 21.4              | 78.6            | 20.91 | 21.90 | 5462.17   | 5722.02   |                            | 1.0000000        |
| 2016 Q2 | 5687   | 21451 | 25601   | 52739           | 27138                | 21.0              | 79.0            | 20.48 | 21.44 | 5556.71   | 5819.52   |                            | 1.0000000        |
| 2016 Q3 | 5527   | 20390 | 26373   | 52290           | 25917                | 21.3              | 78.7            | 20.83 | 21.83 | 5398.86   | 5657.34   |                            | 1.0000000        |
| 2016 Q4 | 4938   | 18139 | 23511   | 46588           | 23077                | 21.4              | 78.6            | 20.87 | 21.93 | 4816.99   | 5061.21   |                            | 1.0000000        |
| 2017 Q1 | 3721   | 14757 | 18125   | 36603           | 18478                | 20.1              | 79.9            | 19.57 | 20.72 | 3615.30   | 3828.99   |                            | 1.0000000        |
| 2017 Q2 | 4698   | 18403 | 23500   | 46601           | 23101                | 20.3              | 79.7            | 19.82 | 20.86 | 4579.23   | 4819.04   |                            | 1.0000000        |
| 2017 Q3 | 4526   | 17376 | 22750   | 44652           | 21902                | 20.7              | 79.3            | 20.13 | 21.21 | 4409.68   | 4644.57   |                            | 1.0000000        |
| 2017 Q4 | 4643   | 16948 | 22190   | 43781           | 21591                | 21.5              | 78.5            | 20.96 | 22.06 | 4525.77   | 4762.42   |                            | 1.0000000        |
| 2018 Q1 | 4227   | 15886 | 20517   | 40630           | 20113                | 21.0              | 79.0            | 20.46 | 21.58 | 4114.86   | 4341.36   |                            | 1.0000000        |
| 2018 Q2 | 3681   | 13671 | 17496   | 34848           | 17352                | 21.2              | 78.8            | 20.61 | 21.83 | 3576.56   | 3787.66   |                            | 1.0000000        |

**Table D3b (for Figure 15b): Breakdown of reviews by reviewer gender and number of reviewers for that submission**

| Number of reviewers | Female | Male   | Unknown | Total For Level | Total Gender Deduced | Female Percentage | Male Percentage | LCI   | UCI   | LCI Count | UCI Count | Significance <sup>30</sup> | Adjusted P-Value |
|---------------------|--------|--------|---------|-----------------|----------------------|-------------------|-----------------|-------|-------|-----------|-----------|----------------------------|------------------|
| 1                   | 14365  | 52559  | 61814   | 128738          | 66924                | 21.5              | 78.5            | 21.16 | 21.78 | 14157.92  | 14574.27  |                            | 1                |
| 2                   | 50422  | 191643 | 238853  | 480918          | 242065               | 20.8              | 79.2            | 20.67 | 20.99 | 50031.52  | 50814.72  |                            | 1                |
| 3                   | 26123  | 101566 | 127431  | 255120          | 127689               | 20.5              | 79.5            | 20.24 | 20.68 | 25841.61  | 26406.66  |                            | 1                |
| 4                   | 3688   | 14401  | 16979   | 35068           | 18089                | 20.4              | 79.6            | 19.81 | 20.98 | 3582.93   | 3795.34   |                            | 1                |
| 5                   | 323    | 1414   | 2028    | 3765            | 1737                 | 18.6              | 81.4            | 16.83 | 20.49 | 292.41    | 356.00    |                            | 1                |
| 6                   | 40     | 144    | 200     | 384             | 184                  | 21.7              | 78.3            | 16.36 | 28.27 | 30.11     | 52.02     |                            | 1                |
| 7                   | 2      | 19     | 28      | 49              | 21                   | 9.5               | 90.5            | 1.45  | 30.12 | 0.30      | 6.33      |                            | 1                |
| 8                   | 0      | 1      | 7       | 8               | 1                    | 0.0               | 100.0           | -3.90 | 83.25 | -         | -         |                            | 1                |

**Table D3c (for Figure 15c): Breakdown of reviews by reviewer gender and number of revisions**

<sup>29</sup> Significance calculated compared to baseline of average for reviews from female reviewers (20.8%)

<sup>30</sup> Significance calculated compared to baseline of average for reviews from female reviewers (20.8%)

| Revision | Female | Male   | Unknown | Total For Level | Total Gender Deduced | Female Percentage | Male Percentage | LCI   | UCI   | LCI Count | UCI Count | Significance <sup>31</sup> | Adjusted P-Value |
|----------|--------|--------|---------|-----------------|----------------------|-------------------|-----------------|-------|-------|-----------|-----------|----------------------------|------------------|
| 0        | 76502  | 298193 | 367428  | 742123          | 374695               | 20.4              | 79.6            | 20.29 | 20.55 | 76019.53  | 76986.75  | Significant                | 2.70e-03         |
| 1        | 16023  | 56573  | 72677   | 145273          | 72596                | 22.1              | 77.9            | 21.77 | 22.37 | 15805.06  | 16243.08  | Significant                | 3.94e-12         |
| 2        | 2070   | 6173   | 6511    | 14754           | 8243                 | 25.1              | 74.9            | 24.19 | 26.06 | 1993.79   | 2148.12   | Significant                | 3.46e-17         |
| 3        | 301    | 704    | 633     | 1638            | 1005                 | 30.0              | 70.0            | 27.20 | 32.86 | 273.34    | 330.19    | Significant                | 8.25e-09         |
| 4        | 51     | 90     | 80      | 221             | 141                  | 36.2              | 63.8            | 28.69 | 44.38 | 40.46     | 62.57     | Significant                | 3.66e-03         |
| 5        | 14     | 11     | 9       | 34              | 25                   | 56.0              | 44.0            | 37.05 | 73.35 | 9.26      | 18.34     | Significant                | 2.99e-03         |
| 6        | 1      | 2      | 2       | 5               | 3                    | 33.3              | 66.7            | 5.63  | 79.76 | 0.17      | 2.39      |                            | 1.00e+00         |
| 7        | 1      | 1      | 0       | 2               | 2                    | 50.0              | 50.0            | 9.45  | 90.55 | 0.19      | 1.81      |                            | 7.45e-01         |

---

<sup>31</sup> Significance calculated compared to baseline of average for reviews from female reviewers (20.8%)

**Table D4 (for Figure 16): Breakdown of reviews by reviewer gender and chemistry sub-discipline**

| Chemistry sub-discipline       | Female | Male   | Unknown | Total For Level | Total Gender Deduced | Female Percentage | Male Percentage | LCI   | UCI   | LCI Count | UCI Count | Significance <sup>32</sup> | Adjusted P-Value |
|--------------------------------|--------|--------|---------|-----------------|----------------------|-------------------|-----------------|-------|-------|-----------|-----------|----------------------------|------------------|
| Analytical                     | 31448  | 100835 | 128803  | 261086          | 132283               | 23.8              | 76.2            | 23.54 | 24.00 | 31145.55  | 31752.46  | Significant                | 2.90e-146        |
| Biological                     | 21260  | 65876  | 66613   | 153749          | 87136                | 24.4              | 75.6            | 24.11 | 24.68 | 21012.50  | 21509.46  | Significant                | 2.98e-140        |
| Catalysis                      | 15153  | 70456  | 96631   | 182240          | 85609                | 17.7              | 82.3            | 17.45 | 17.96 | 14935.36  | 15373.12  | Significant                | 6.09e-110        |
| Chemical Biology and Medicinal | 22356  | 70708  | 75888   | 168952          | 93064                | 24.0              | 76.0            | 23.75 | 24.30 | 22101.56  | 22612.44  | Significant                | 4.04e-120        |
| Energy                         | 20466  | 84826  | 164926  | 270218          | 105292               | 19.4              | 80.6            | 19.20 | 19.68 | 20215.50  | 20718.84  | Significant                | 4.98e-23         |
| Environmental                  | 10627  | 30112  | 39434   | 80173           | 40739                | 26.1              | 73.9            | 25.66 | 26.51 | 10454.21  | 10801.62  | Significant                | 2.12e-139        |
| Food                           | 11075  | 24504  | 28422   | 64001           | 35579                | 31.1              | 68.9            | 30.65 | 31.61 | 10904.56  | 11246.89  | Significant                | 1.76e-319        |
| Inorganic                      | 18906  | 60053  | 47845   | 126804          | 78959                | 23.9              | 76.1            | 23.65 | 24.24 | 18671.98  | 19142.02  | Significant                | 1.29e-96         |
| Materials                      | 46370  | 183372 | 288303  | 518045          | 229742               | 20.2              | 79.8            | 20.02 | 20.35 | 45994.08  | 46748.21  | Significant                | 6.39e-08         |
| Miscellaneous                  | 529    | 1709   | 1101    | 3339            | 2238                 | 23.6              | 76.4            | 21.92 | 25.44 | 490.63    | 569.40    |                            | 1.00e+00         |
| Nanoscience                    | 35833  | 136450 | 248849  | 421132          | 172283               | 20.8              | 79.2            | 20.61 | 20.99 | 35503.94  | 36164.31  |                            | 1.00e+00         |
| Organic                        | 10371  | 58987  | 49590   | 118948          | 69358                | 15.0              | 85.0            | 14.69 | 15.22 | 10188.27  | 10556.42  | Significant                | 6.85e-319        |
| Physical                       | 27293  | 125224 | 138222  | 290739          | 152517               | 17.9              | 82.1            | 17.70 | 18.09 | 27000.83  | 27587.63  | Significant                | 5.09e-173        |
| NA                             | 98     | 408    | 297     | 803             | 506                  | 19.4              | 80.6            | 16.15 | 23.04 | 81.73     | 116.60    |                            | 1.00e+00         |

<sup>32</sup> Significance calculated compared to baseline of average for reviews from female reviewers (20.8%)

**Table E1a (for Figure 17): Multinomial GLM model of proportion of review recommendations and corresponding author gender**

| Corresponding author gender | Reviewer major decision | fit (Proportion of reviews) | Standard Error | LCI   | UCI   |
|-----------------------------|-------------------------|-----------------------------|----------------|-------|-------|
| F                           | accept                  | 0.212                       | 0.0018         | 0.209 | 0.216 |
| M                           | accept                  | 0.221                       | 0.0010         | 0.219 | 0.223 |
| F                           | minor.revision          | 0.288                       | 0.0020         | 0.284 | 0.291 |
| M                           | minor.revision          | 0.304                       | 0.0011         | 0.302 | 0.306 |
| F                           | major.revision          | 0.206                       | 0.0017         | 0.203 | 0.210 |
| M                           | major.revision          | 0.192                       | 0.0009         | 0.190 | 0.194 |
| F                           | reject                  | 0.294                       | 0.0020         | 0.290 | 0.298 |
| M                           | reject                  | 0.283                       | 0.0011         | 0.281 | 0.286 |

**Table E2 (for Figure 18): Multinomial GLM model of proportion of first round review recommendations and reviewer gender**

| Reviewer gender | Reviewer major decision | fit (Proportion of reviews) | Standard Error | LCI   | UCI   |
|-----------------|-------------------------|-----------------------------|----------------|-------|-------|
| F               | accept                  | 0.226                       | 0.0019         | 0.222 | 0.230 |
| M               | accept                  | 0.217                       | 0.0010         | 0.215 | 0.219 |
| F               | minor.revision          | 0.300                       | 0.0021         | 0.296 | 0.304 |
| M               | minor.revision          | 0.300                       | 0.0011         | 0.298 | 0.302 |
| F               | major.revision          | 0.213                       | 0.0019         | 0.209 | 0.217 |
| M               | major.revision          | 0.191                       | 0.0009         | 0.189 | 0.192 |
| F               | reject                  | 0.261                       | 0.0020         | 0.257 | 0.265 |
| M               | reject                  | 0.292                       | 0.0011         | 0.290 | 0.294 |

**Table E3 (for Figure 19): Multinomial GLM model of proportion of review recommendations, corresponding author gender and reviewer gender**

| Reviewer gender | Corresponding author gender | Reviewer major decision | fit (Proportion of reviews) | Standard Error | LCI   | UCI     |
|-----------------|-----------------------------|-------------------------|-----------------------------|----------------|-------|---------|
| F               | F                           | accept                  | 0.116                       | 0.110          | 0.122 | 0.00317 |
| F               | F                           | major.revision          | 0.261                       | 0.252          | 0.269 | 0.00434 |
| F               | F                           | minor.revision          | 0.318                       | 0.309          | 0.327 | 0.00460 |
| F               | F                           | reject                  | 0.305                       | 0.296          | 0.314 | 0.00455 |
| F               | M                           | accept                  | 0.128                       | 0.124          | 0.131 | 0.00199 |
| F               | M                           | major.revision          | 0.243                       | 0.238          | 0.248 | 0.00256 |
| F               | M                           | minor.revision          | 0.322                       | 0.317          | 0.328 | 0.00279 |
| F               | M                           | reject                  | 0.308                       | 0.302          | 0.313 | 0.00276 |
| M               | F                           | accept                  | 0.106                       | 0.103          | 0.109 | 0.00168 |
| M               | F                           | major.revision          | 0.231                       | 0.227          | 0.236 | 0.00231 |
| M               | F                           | minor.revision          | 0.308                       | 0.303          | 0.313 | 0.00253 |
| M               | F                           | reject                  | 0.354                       | 0.349          | 0.360 | 0.00262 |
| M               | M                           | accept                  | 0.126                       | 0.124          | 0.128 | 0.00096 |
| M               | M                           | major.revision          | 0.214                       | 0.212          | 0.217 | 0.00119 |
| M               | M                           | minor.revision          | 0.329                       | 0.327          | 0.332 | 0.00136 |
| M               | M                           | reject                  | 0.331                       | 0.328          | 0.334 | 0.00136 |



**Table F1a: Breakdown of submissions by corresponding author gender and final outcome**

| Final outcome | Female | Male   | Unknown | Total For Level | Total Gender Deduced | Female Percentage | Male Percentage | LCI   | UCI   | LCI Count | UCI Count | Significance <sup>33</sup> | Adjusted P-Value |
|---------------|--------|--------|---------|-----------------|----------------------|-------------------|-----------------|-------|-------|-----------|-----------|----------------------------|------------------|
| accepted      | 35206  | 118443 | 174039  | 327688          | 153649               | 22.9              | 77.1            | 22.70 | 23.12 | 34884.16  | 35529.92  | Significant                | 1.25e-14         |
| rejected      | 38130  | 114749 | 227835  | 380714          | 152879               | 24.9              | 75.1            | 24.73 | 25.16 | 37799.39  | 38462.54  | Significant                | 3.21e-16         |
| revise        | 125    | 424    | 464     | 1013            | 549                  | 22.8              | 77.2            | 19.45 | 26.46 | 106.79    | 145.29    |                            | 1.00e+00         |
| undecided     | 845    | 2694   | 4154    | 7693            | 3539                 | 23.9              | 76.1            | 22.50 | 25.31 | 796.30    | 895.70    |                            | 1.00e+00         |

---

<sup>33</sup> Significance calculated compared to baseline of average for original submissions from female corresponding authors (23.9%)

**Table F1b: Breakdown of submissions by first author gender and final outcome**

| Final outcome | Female | Male   | Unknown | Total For Level | Total Gender Deduced | Female Percentage | Male Percentage | LCI   | UCI   | LCI Count | UCI Count | Significance <sup>34</sup> | Adjusted P-Value |
|---------------|--------|--------|---------|-----------------|----------------------|-------------------|-----------------|-------|-------|-----------|-----------|----------------------------|------------------|
| accepted      | 51007  | 103217 | 173464  | 327688          | 154224               | 33.1              | 66.9            | 32.84 | 33.31 | 50645.53  | 51369.78  |                            | 1                |
| rejected      | 53971  | 105477 | 221266  | 380714          | 159448               | 33.8              | 66.2            | 33.62 | 34.08 | 53601.29  | 54341.95  |                            | 1                |
| revise        | 175    | 332    | 506     | 1013            | 507                  | 34.5              | 65.5            | 30.51 | 38.76 | 154.67    | 196.51    |                            | 1                |
| undecided     | 1118   | 2413   | 4162    | 7693            | 3531                 | 31.7              | 68.3            | 30.15 | 33.22 | 1064.55   | 1172.86   |                            | 1                |

---

<sup>34</sup> Significance calculated compared to baseline of average for original submissions from female first authors (33.4%)

**Table F2a: Breakdown of reviews by reviewer gender and whether the reviewer recommendation agreed with the Editor’s status**

| StautsAndRe.commendationAgree | Female | Male   | Unknown | Total For Level | Total Gender Deduced | Female Percentage | Male Percentage | LCI   | UCI   | LCI Count | UCI Count | Significance <sup>35</sup> | Adjusted P-Value |
|-------------------------------|--------|--------|---------|-----------------|----------------------|-------------------|-----------------|-------|-------|-----------|-----------|----------------------------|------------------|
| Agree                         | 78845  | 298073 | 365499  | 742417          | 376918               | 20.9              | 79.1            | 20.79 | 21.05 | 78356.71  | 79335.53  |                            | 1                |
| Disagree                      | 16118  | 63674  | 81841   | 161633          | 79792                | 20.2              | 79.8            | 19.92 | 20.48 | 15896.86  | 16341.43  |                            | 1                |

<sup>35</sup> Significance calculated compared to baseline of average for reviews from female reviewers (20.8%)

**Table F2b (for Figure 20a): Binomial GLM model of “Status And Recommendation Agree” variable, reviewer gender and corresponding author gender**

| Reviewer gender | Corresponding author gender | fit <sup>36</sup> | Standard Error | LCI   | UCI   | Population Size |
|-----------------|-----------------------------|-------------------|----------------|-------|-------|-----------------|
| F               | F                           | 0.834             | 0.024          | 0.830 | 0.838 | 12810           |
| M               | F                           | 0.834             | 0.014          | 0.831 | 0.837 | 34620           |
| F               | M                           | 0.827             | 0.013          | 0.825 | 0.830 | 40868           |
| M               | M                           | 0.828             | 0.007          | 0.827 | 0.829 | 144873          |

---

<sup>36</sup> Model fit: StatusAndRecommendationAgree ~ ReviewerGender \* CorrespondingAuthorGender

**Table F2c (for Figure 20b): Binomial GLM model of “Status And Recommendation Agree” variable, reviewer gender and editor gender**

| Reviewer gender | Editor gender | fit <sup>37</sup> | Standard Error | LCI   | UCI   | Population Size |
|-----------------|---------------|-------------------|----------------|-------|-------|-----------------|
| F               | F             | 0.840             | 0.017          | 0.836 | 0.843 | 24416           |
| M               | F             | 0.833             | 0.016          | 0.830 | 0.836 | 27395           |
| F               | M             | 0.820             | 0.009          | 0.818 | 0.822 | 77755           |
| M               | M             | 0.834             | 0.008          | 0.832 | 0.835 | 117564          |

---

<sup>37</sup> Model fit: StatusAndRecommendationAgree ~ ReviewerGender \* CorrespondingAuthorGender

**Table F3a (for Figure 21): Breakdown of accepted submissions by corresponding author gender and chemistry sub-discipline**

| Chemistry sub-discipline       | Female | Male  | Unknown | Total For Level | Total Gender Deduced | Female Percentage | Male Percentage | LCI   | UCI   | LCI Count | UCI Count | Significance <sup>38</sup> | Adjusted P-Value |
|--------------------------------|--------|-------|---------|-----------------|----------------------|-------------------|-----------------|-------|-------|-----------|-----------|----------------------------|------------------|
| Analytical                     | 15372  | 42251 | 57222   | 114845          | 57623                | 26.7              | 73.3            | 26.32 | 27.04 | 15165     | 15581     | Significant                | 5.46e-49         |
| Biological                     | 11113  | 29220 | 33631   | 73964           | 40333                | 27.6              | 72.4            | 27.12 | 27.99 | 10938     | 11290     | Significant                | 1.20e-59         |
| Catalysis                      | 6608   | 26243 | 47088   | 79939           | 32851                | 20.1              | 79.9            | 19.69 | 20.55 | 6467      | 6752      | Significant                | 6.44e-56         |
| Chemical Biology and Medicinal | 11759  | 30769 | 37698   | 80226           | 42528                | 27.7              | 72.3            | 27.23 | 28.08 | 11579     | 11941     | Significant                | 1.72e-66         |
| Energy                         | 8801   | 34096 | 76723   | 119620          | 42897                | 20.5              | 79.5            | 20.14 | 20.90 | 8638      | 8966      | Significant                | 4.74e-58         |
| Environmental                  | 5343   | 12324 | 19602   | 37269           | 17667                | 30.2              | 69.8            | 29.57 | 30.92 | 5224      | 5463      | Significant                | 2.80e-78         |
| Food                           | 5188   | 9828  | 14728   | 29744           | 15016                | 34.5              | 65.5            | 33.79 | 35.31 | 5074      | 5303      | Significant                | 6.49e-185        |
| Inorganic                      | 6146   | 23898 | 22122   | 52166           | 30044                | 20.5              | 79.5            | 20.00 | 20.92 | 6010      | 6284      | Significant                | 1.68e-41         |
| Materials                      | 23220  | 77945 | 134972  | 236137          | 101165               | 23.0              | 77.0            | 22.69 | 23.21 | 22959     | 23483     | Significant                | 1.30e-07         |
| Miscellaneous                  | 287    | 934   | 738     | 1959            | 1221                 | 23.5              | 76.5            | 21.21 | 25.97 | 258.98    | 317.04    |                            | 1.00e+00         |
| Nanoscience                    | 17713  | 55679 | 119826  | 193218          | 73392                | 24.1              | 75.9            | 23.83 | 24.45 | 17487     | 17941     |                            | 1.00e+00         |
| Organic                        | 4911   | 23062 | 22931   | 50904           | 27973                | 17.6              | 82.4            | 17.11 | 18.01 | 4788      | 5037      | Significant                | 9.56e-142        |
| Physical                       | 14380  | 53127 | 66430   | 133937          | 67507                | 21.3              | 78.7            | 20.99 | 21.61 | 14173     | 14590     | Significant                | 4.97e-53         |

<sup>38</sup> Significance calculated compared to baseline of average for original submissions from female corresponding authors (23.9%)

**Figure and Table F3b: Breakdown of accepted submissions by first author gender and chemistry sub-discipline**

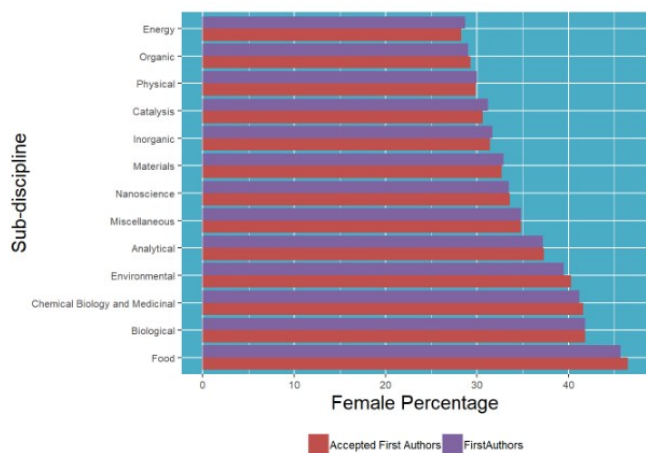

| Chemistry sub-discipline       | Female | Male  | Unknown | Total For Level | Total Gender Deduced | Female Percentage | Male Percentage | LCI   | UCI   | LCI Count | UCI Count | Significance <sup>39</sup> | Adjusted P-Value |
|--------------------------------|--------|-------|---------|-----------------|----------------------|-------------------|-----------------|-------|-------|-----------|-----------|----------------------------|------------------|
| Analytical                     | 21673  | 36364 | 56808   | 114845          | 58037                | 37.3              | 62.7            | 36.95 | 37.74 | 21445.10  | 21901.88  | Significant                | 7.12e-84         |
| Biological                     | 16672  | 23188 | 34104   | 73964           | 39860                | 41.8              | 58.2            | 41.34 | 42.31 | 16479.30  | 16865.33  | Significant                | 2.02e-264        |
| Catalysis                      | 10289  | 23285 | 46365   | 79939           | 33574                | 30.6              | 69.4            | 30.15 | 31.14 | 10124.18  | 10455.30  | Significant                | 1.59e-22         |
| Chemical Biology and Medicinal | 17609  | 24721 | 37896   | 80226           | 42330                | 41.6              | 58.4            | 41.13 | 42.07 | 17410.57  | 17808.07  | Significant                | 4.60e-266        |
| Energy                         | 12452  | 31564 | 75604   | 119620          | 44016                | 28.3              | 71.7            | 27.87 | 28.71 | 12267.63  | 12638.04  | Significant                | 6.22e-113        |
| Environmental                  | 7249   | 10759 | 19261   | 37269           | 18008                | 40.3              | 59.7            | 39.54 | 40.97 | 7120.40   | 7378.35   | Significant                | 4.87e-78         |
| Food                           | 7190   | 8257  | 14297   | 29744           | 15447                | 46.5              | 53.5            | 45.76 | 47.33 | 7068.64   | 7311.62   | Significant                | 5.37e-246        |
| Inorganic                      | 9294   | 20299 | 22573   | 52166           | 29593                | 31.4              | 68.6            | 30.88 | 31.94 | 9138.23   | 9451.20   | Significant                | 8.27e-09         |
| Materials                      | 33512  | 68899 | 133726  | 236137          | 102411               | 32.7              | 67.3            | 32.44 | 33.01 | 33218.37  | 33806.95  |                            | 4.37e-01         |
| Miscellaneous                  | 417    | 781   | 761     | 1959            | 1198                 | 34.8              | 65.2            | 32.16 | 37.55 | 385.31    | 449.86    |                            | 1.00e+00         |
| Nanoscience                    | 25632  | 50677 | 116909  | 193218          | 76309                | 33.6              | 66.4            | 33.26 | 33.93 | 25376.92  | 25888.34  |                            | 1.00e+00         |
| Organic                        | 8135   | 19646 | 23123   | 50904           | 27781                | 29.3              | 70.7            | 28.75 | 29.82 | 7987.14   | 8284.45   | Significant                | 1.56e-44         |
| Physical                       | 20068  | 47150 | 66719   | 133937          | 67218                | 29.9              | 70.1            | 29.51 | 30.20 | 19836.24  | 20301.31  | Significant                | 2.62e-81         |

<sup>39</sup> Significance calculated compared to baseline of average for original submissions from female first authors (33.4%)

**Table F3c (for Figure 22): Binomial GLM model of corresponding author gender of accepted submissions, chemistry sub-discipline and journal impact factor**

| Impact factor (IF 2017) | Chemistry sub-discipline (cats) | fit <sup>40</sup> | Standard Error | LCI   | UCI   | Population Size |
|-------------------------|---------------------------------|-------------------|----------------|-------|-------|-----------------|
| 1.6                     | Analytical                      | 0.329             | 0.017          | 0.324 | 0.334 | 17694           |
| 1.6                     | Biological                      | 0.336             | 0.021          | 0.330 | 0.342 | 9076            |
| 1.6                     | Catalysis                       | 0.228             | 0.026          | 0.223 | 0.234 | 7863            |
| 1.6                     | Chemical Biology and Medicinal  | 0.327             | 0.020          | 0.321 | 0.332 | 11403           |
| 1.6                     | Energy                          | 0.230             | 0.023          | 0.224 | 0.235 | 9270            |
| 1.6                     | Environmental                   | 0.329             | 0.025          | 0.322 | 0.336 | 9176            |
| 1.6                     | Food                            | 0.400             | 0.027          | 0.392 | 0.408 | 6028            |
| 1.6                     | Inorganic                       | 0.263             | 0.030          | 0.256 | 0.271 | 2889            |
| 1.6                     | Materials                       | 0.267             | 0.014          | 0.264 | 0.271 | 23023           |
| 1.6                     | Miscellaneous                   | 0.391             | 0.095          | 0.362 | 0.420 | 436             |
| 1.6                     | Nanoscience                     | 0.284             | 0.017          | 0.280 | 0.288 | 17162           |
| 1.6                     | Organic                         | 0.226             | 0.028          | 0.219 | 0.232 | 6192            |
| 1.6                     | Physical                        | 0.240             | 0.018          | 0.236 | 0.244 | 11861           |
| 10                      | Analytical                      | 0.162             | 0.033          | 0.157 | 0.168 | 2523            |
| 10                      | Biological                      | 0.186             | 0.034          | 0.180 | 0.193 | 2812            |
| 10                      | Catalysis                       | 0.174             | 0.032          | 0.168 | 0.180 | 3914            |
| 10                      | Chemical Biology and Medicinal  | 0.198             | 0.034          | 0.191 | 0.205 | 2703            |
| 10                      | Energy                          | 0.194             | 0.021          | 0.190 | 0.199 | 10875           |
| 10                      | Environmental                   | 0.250             | 0.052          | 0.238 | 0.263 | 851             |
| 10                      | Food                            | 0.213             | 0.066          | 0.199 | 0.227 | 423             |
| 10                      | Inorganic                       | 0.127             | 0.050          | 0.120 | 0.134 | 2256            |
| 10                      | Materials                       | 0.191             | 0.018          | 0.187 | 0.195 | 12079           |
| 10                      | Miscellaneous                   | 0.039             | 0.257          | 0.028 | 0.053 | 111             |
| 10                      | Nanoscience                     | 0.204             | 0.020          | 0.200 | 0.208 | 8413            |
| 10                      | Organic                         | 0.113             | 0.045          | 0.108 | 0.119 | 2406            |
| 10                      | Physical                        | 0.181             | 0.027          | 0.176 | 0.187 | 5553            |
| 13                      | Analytical                      | 0.122             | 0.048          | 0.116 | 0.129 | 65              |
| 13                      | Biological                      | 0.147             | 0.051          | 0.139 | 0.155 | 50              |
| 13                      | Catalysis                       | 0.157             | 0.049          | 0.149 | 0.165 | 24              |
| 13                      | Chemical Biology and Medicinal  | 0.162             | 0.051          | 0.153 | 0.171 | 27              |
| 13                      | Energy                          | 0.183             | 0.033          | 0.177 | 0.189 | 219             |
| 13                      | Environmental                   | 0.225             | 0.076          | 0.209 | 0.242 | 21              |
| 13                      | Food                            | 0.163             | 0.096          | 0.147 | 0.181 | 13              |
| 13                      | Inorganic                       | 0.096             | 0.076          | 0.087 | 0.104 | 38              |
| 13                      | Materials                       | 0.168             | 0.028          | 0.163 | 0.173 | 506             |
| 13                      | Miscellaneous                   | 0.015             | 0.365          | 0.009 | 0.023 | 0               |
| 13                      | Nanoscience                     | 0.180             | 0.031          | 0.174 | 0.186 | 359             |
| 13                      | Organic                         | 0.087             | 0.068          | 0.080 | 0.094 | 2               |
| 13                      | Physical                        | 0.164             | 0.040          | 0.157 | 0.171 | 244             |
| 4.5                     | Analytical                      | 0.262             | 0.010          | 0.260 | 0.265 | 22997           |
| 4.5                     | Biological                      | 0.278             | 0.012          | 0.275 | 0.281 | 16595           |
| 4.5                     | Catalysis                       | 0.208             | 0.015          | 0.205 | 0.211 | 12179           |
| 4.5                     | Chemical Biology and Medicinal  | 0.278             | 0.011          | 0.275 | 0.280 | 17938           |
| 4.5                     | Energy                          | 0.217             | 0.014          | 0.214 | 0.220 | 9729            |
| 4.5                     | Environmental                   | 0.300             | 0.017          | 0.295 | 0.305 | 4469            |
| 4.5                     | Food                            | 0.328             | 0.020          | 0.322 | 0.334 | 6243            |
| 4.5                     | Inorganic                       | 0.208             | 0.015          | 0.205 | 0.211 | 18110           |
| 4.5                     | Materials                       | 0.239             | 0.008          | 0.237 | 0.241 | 35428           |
| 4.5                     | Miscellaneous                   | 0.198             | 0.083          | 0.181 | 0.215 | 354             |
| 4.5                     | Nanoscience                     | 0.254             | 0.009          | 0.252 | 0.257 | 19799           |
| 4.5                     | Organic                         | 0.180             | 0.016          | 0.177 | 0.183 | 11503           |
| 4.5                     | Physical                        | 0.218             | 0.010          | 0.216 | 0.220 | 32659           |
| 7.4                     | Analytical                      | 0.205             | 0.020          | 0.201 | 0.209 | 12709           |
| 7.4                     | Biological                      | 0.226             | 0.021          | 0.222 | 0.231 | 9004            |
| 7.4                     | Catalysis                       | 0.189             | 0.019          | 0.186 | 0.193 | 7784            |
| 7.4                     | Chemical Biology and Medicinal  | 0.233             | 0.020          | 0.228 | 0.238 | 8338            |
| 7.4                     | Energy                          | 0.205             | 0.014          | 0.202 | 0.208 | 9043            |
| 7.4                     | Environmental                   | 0.273             | 0.033          | 0.265 | 0.281 | 2689            |
| 7.4                     | Food                            | 0.263             | 0.042          | 0.253 | 0.274 | 1567            |
| 7.4                     | Inorganic                       | 0.161             | 0.029          | 0.156 | 0.166 | 6048            |
| 7.4                     | Materials                       | 0.213             | 0.011          | 0.210 | 0.215 | 25862           |
| 7.4                     | Miscellaneous                   | 0.086             | 0.167          | 0.071 | 0.105 | 291             |
| 7.4                     | Nanoscience                     | 0.227             | 0.012          | 0.224 | 0.230 | 24554           |
| 7.4                     | Organic                         | 0.142             | 0.027          | 0.137 | 0.146 | 7311            |
| 7.4                     | Physical                        | 0.198             | 0.016          | 0.195 | 0.201 | 14697           |

<sup>40</sup> Model fit: CorrespondingAuthorGender ~cats \* IF2017



**Figure and Table F3d: Binomial GLM model of first author gender of accepted submissions, chemistry sub-discipline and journal impact factor**

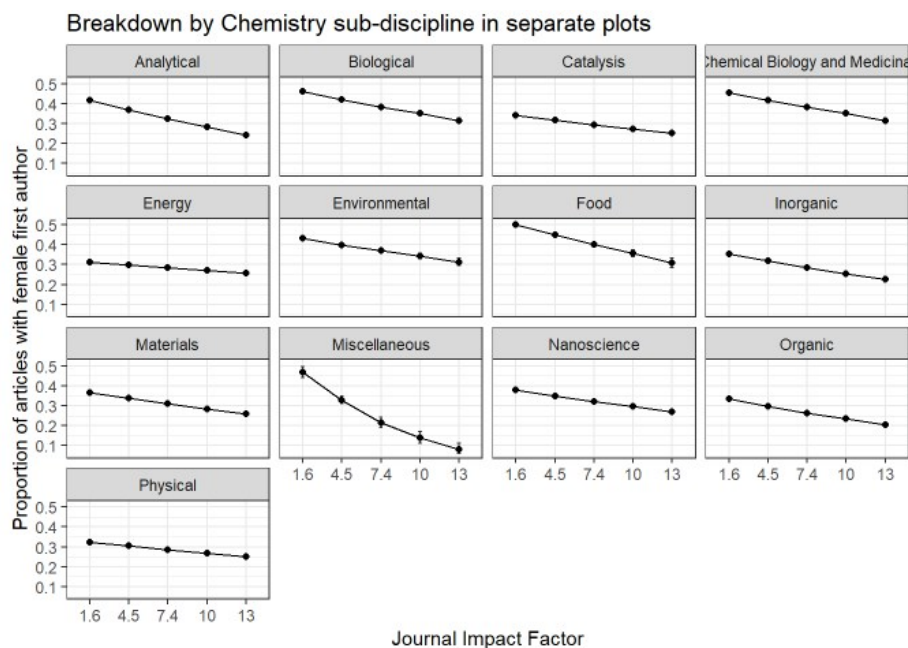

| Impact factor (IF 2017) | Chemistry sub-discipline (cats) | fit <sup>41</sup> | Standard Error | LCI   | UCI   | Population Size |
|-------------------------|---------------------------------|-------------------|----------------|-------|-------|-----------------|
| 1.6                     | Analytical                      | 0.418             | 0.015          | 0.413 | 0.423 | 18623           |
| 1.6                     | Biological                      | 0.460             | 0.019          | 0.454 | 0.466 | 9101            |
| 1.6                     | Catalysis                       | 0.341             | 0.022          | 0.335 | 0.347 | 8502            |
| 1.6                     | Chemical Biology and Medicinal  | 0.455             | 0.018          | 0.449 | 0.461 | 11536           |
| 1.6                     | Energy                          | 0.311             | 0.020          | 0.305 | 0.316 | 10024           |
| 1.6                     | Environmental                   | 0.430             | 0.023          | 0.423 | 0.437 | 9744            |
| 1.6                     | Food                            | 0.502             | 0.025          | 0.494 | 0.510 | 6250            |
| 1.6                     | Inorganic                       | 0.353             | 0.026          | 0.346 | 0.361 | 3054            |
| 1.6                     | Materials                       | 0.367             | 0.012          | 0.363 | 0.371 | 25141           |
| 1.6                     | Miscellaneous                   | 0.468             | 0.089          | 0.440 | 0.496 | 428             |
| 1.6                     | Nanoscience                     | 0.378             | 0.015          | 0.374 | 0.383 | 18939           |
| 1.6                     | Organic                         | 0.335             | 0.024          | 0.329 | 0.342 | 6300            |
| 1.6                     | Physical                        | 0.324             | 0.016          | 0.319 | 0.328 | 12481           |
| 10                      | Analytical                      | 0.283             | 0.029          | 0.276 | 0.291 | 2262            |
| 10                      | Biological                      | 0.350             | 0.030          | 0.341 | 0.359 | 2511            |
| 10                      | Catalysis                       | 0.272             | 0.027          | 0.266 | 0.279 | 4051            |
| 10                      | Chemical Biology and Medicinal  | 0.350             | 0.030          | 0.341 | 0.358 | 2469            |
| 10                      | Energy                          | 0.271             | 0.019          | 0.267 | 0.276 | 11342           |
| 10                      | Environmental                   | 0.343             | 0.048          | 0.329 | 0.356 | 913             |
| 10                      | Food                            | 0.356             | 0.059          | 0.339 | 0.374 | 375             |
| 10                      | Inorganic                       | 0.255             | 0.041          | 0.245 | 0.265 | 2154            |
| 10                      | Materials                       | 0.284             | 0.016          | 0.280 | 0.288 | 12036           |
| 10                      | Miscellaneous                   | 0.139             | 0.188          | 0.112 | 0.170 | 106             |
| 10                      | Nanoscience                     | 0.296             | 0.017          | 0.291 | 0.300 | 8955            |
| 10                      | Organic                         | 0.234             | 0.036          | 0.226 | 0.242 | 2253            |
| 10                      | Physical                        | 0.268             | 0.024          | 0.262 | 0.274 | 5383            |
| 13                      | Analytical                      | 0.242             | 0.043          | 0.232 | 0.252 | 72              |
| 13                      | Biological                      | 0.314             | 0.045          | 0.302 | 0.326 | 56              |
| 13                      | Catalysis                       | 0.250             | 0.042          | 0.240 | 0.260 | 24              |
| 13                      | Chemical Biology and Medicinal  | 0.315             | 0.045          | 0.302 | 0.327 | 37              |
| 13                      | Energy                          | 0.258             | 0.029          | 0.251 | 0.265 | 184             |
| 13                      | Environmental                   | 0.313             | 0.069          | 0.295 | 0.333 | 21              |
| 13                      | Food                            | 0.309             | 0.085          | 0.286 | 0.333 | 15              |
| 13                      | Inorganic                       | 0.225             | 0.063          | 0.211 | 0.239 | 31              |
| 13                      | Materials                       | 0.258             | 0.024          | 0.252 | 0.264 | 445             |

<sup>41</sup> Model fit: Model: FirstAuthorGender ~ Category \* ImpactFactor. ANOVA: Category is highly significant (p = 0.00e00); ImpactFactor is highly significant (p = 8.36e-261); Category\*ImpactFactor interactions are highly significant (p = 8.87e-22).

|     |                                |       |       |       |       |       |
|-----|--------------------------------|-------|-------|-------|-------|-------|
| 13  | Miscellaneous                  | 0.081 | 0.270 | 0.059 | 0.111 | 0     |
| 13  | Nanoscience                    | 0.269 | 0.027 | 0.262 | 0.276 | 328   |
| 13  | Organic                        | 0.203 | 0.053 | 0.193 | 0.215 | 2     |
| 13  | Physical                       | 0.250 | 0.036 | 0.241 | 0.259 | 246   |
| 4.5 | Analytical                     | 0.369 | 0.009 | 0.366 | 0.371 | 23173 |
| 4.5 | Biological                     | 0.421 | 0.011 | 0.418 | 0.424 | 16422 |
| 4.5 | Catalysis                      | 0.316 | 0.013 | 0.313 | 0.320 | 12045 |
| 4.5 | Chemical Biology and Medicinal | 0.418 | 0.010 | 0.415 | 0.421 | 17910 |
| 4.5 | Energy                         | 0.297 | 0.013 | 0.293 | 0.300 | 9688  |
| 4.5 | Environmental                  | 0.399 | 0.016 | 0.394 | 0.404 | 4428  |
| 4.5 | Food                           | 0.450 | 0.018 | 0.445 | 0.456 | 6482  |
| 4.5 | Inorganic                      | 0.317 | 0.013 | 0.314 | 0.321 | 17907 |
| 4.5 | Materials                      | 0.337 | 0.007 | 0.335 | 0.339 | 34986 |
| 4.5 | Miscellaneous                  | 0.329 | 0.066 | 0.310 | 0.348 | 371   |
| 4.5 | Nanoscience                    | 0.349 | 0.008 | 0.346 | 0.351 | 20298 |
| 4.5 | Organic                        | 0.298 | 0.013 | 0.294 | 0.302 | 11310 |
| 4.5 | Physical                       | 0.304 | 0.009 | 0.302 | 0.306 | 31981 |
| 7.4 | Analytical                     | 0.322 | 0.017 | 0.317 | 0.327 | 12355 |
| 7.4 | Biological                     | 0.383 | 0.018 | 0.378 | 0.388 | 9002  |
| 7.4 | Catalysis                      | 0.293 | 0.016 | 0.288 | 0.297 | 7768  |
| 7.4 | Chemical Biology and Medicinal | 0.381 | 0.018 | 0.376 | 0.387 | 8260  |
| 7.4 | Energy                         | 0.283 | 0.012 | 0.280 | 0.286 | 9113  |
| 7.4 | Environmental                  | 0.369 | 0.030 | 0.360 | 0.378 | 2453  |
| 7.4 | Food                           | 0.400 | 0.037 | 0.388 | 0.411 | 1603  |
| 7.4 | Inorganic                      | 0.283 | 0.024 | 0.277 | 0.290 | 5777  |
| 7.4 | Materials                      | 0.309 | 0.010 | 0.306 | 0.311 | 25792 |
| 7.4 | Miscellaneous                  | 0.214 | 0.120 | 0.189 | 0.241 | 265   |
| 7.4 | Nanoscience                    | 0.320 | 0.010 | 0.317 | 0.323 | 24835 |
| 7.4 | Organic                        | 0.263 | 0.021 | 0.258 | 0.268 | 7366  |
| 7.4 | Physical                       | 0.285 | 0.014 | 0.281 | 0.289 | 14693 |

**Table F4a (for Figure 23): Breakdown of accepted submissions by corresponding author gender and final number of revisions**

| Final number of revisions | Female | Male  | Unknown | Total For Level | Total Gender Deduced | Female Percentage | Male Percentage | LCI   | UCI   | LCI Count | UCI Count | Significance <sup>42</sup> | Adjusted P-Value |
|---------------------------|--------|-------|---------|-----------------|----------------------|-------------------|-----------------|-------|-------|-----------|-----------|----------------------------|------------------|
| 0                         | 1300   | 4780  | 5900    | 11980           | 6080                 | 21.4              | 78.6            | 20.37 | 22.43 | 1238.44   | 1363.76   | Significant                | 2.04e-02         |
| 1                         | 24709  | 85294 | 122212  | 232215          | 110003               | 22.5              | 77.5            | 22.22 | 22.71 | 24438.77  | 24981.35  | Significant                | 2.37e-24         |
| 2                         | 7877   | 24488 | 38794   | 71159           | 32365                | 24.3              | 75.7            | 23.87 | 24.81 | 7726.68   | 8029.29   |                            | 1.00e+00         |
| 3                         | 1071   | 3263  | 5995    | 10329           | 4334                 | 24.7              | 75.3            | 23.45 | 26.02 | 1016.32   | 1127.62   |                            | 1.00e+00         |
| 4                         | 217    | 536   | 968     | 1721            | 753                  | 28.8              | 71.2            | 25.70 | 32.16 | 193.49    | 242.13    |                            | 1.00e+00         |
| 5                         | 32     | 82    | 170     | 284             | 114                  | 28.1              | 71.9            | 20.61 | 36.96 | 23.50     | 42.13     |                            | 1.00e+00         |

---

<sup>42</sup> Significance calculated compared to baseline of average for original submissions from female corresponding authors (23.9%)

**Figure and Table F4b: Breakdown of accepted submissions by first author gender and final number of revisions**

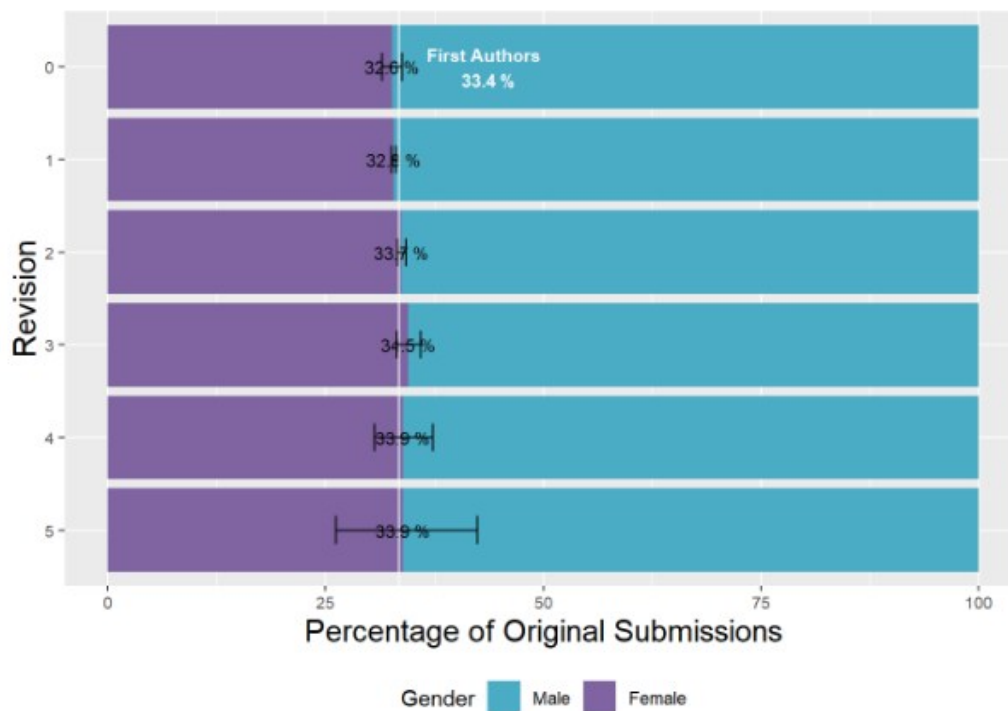

| Final number of revisions | Female | Male  | Unknown | Total For Level | Total Gender Deduced | Female Percentage | Male Percentage | LCI   | UCI   | LCI Count | UCI Count | Significance <sup>43</sup> | Adjusted P-Value |
|---------------------------|--------|-------|---------|-----------------|----------------------|-------------------|-----------------|-------|-------|-----------|-----------|----------------------------|------------------|
| 0                         | 1968   | 4064  | 5948    | 11980           | 6032                 | 32.6              | 67.4            | 31.45 | 33.82 | 1897.31   | 2040.02   |                            | 1                |
| 1                         | 36176  | 74007 | 122032  | 232215          | 110183               | 32.8              | 67.2            | 32.56 | 33.11 | 35871.14  | 36482.17  |                            | 1                |
| 2                         | 10976  | 21553 | 38630   | 71159           | 32529                | 33.7              | 66.3            | 33.23 | 34.26 | 10809.49  | 11143.76  |                            | 1                |
| 3                         | 1587   | 3008  | 5734    | 10329           | 4595                 | 34.5              | 65.5            | 33.18 | 35.92 | 1524.44   | 1650.75   |                            | 1                |
| 4                         | 257    | 501   | 963     | 1721            | 758                  | 33.9              | 66.1            | 30.62 | 37.35 | 232.12    | 283.11    |                            | 1                |
| 5                         | 43     | 84    | 157     | 284             | 127                  | 33.9              | 66.1            | 26.20 | 42.47 | 33.27     | 53.93     |                            | 1                |

<sup>43</sup> Significance calculated compared to baseline of average for original submissions from female first authors (33.4%)

**Table G1a (for Figure 24): Gender breakdown of corresponding and first authors of cited and citing articles of citations in comparison to those of all publications**

| Author type                                    | Female | Male   | Unknown | Total For Level | Total Gender Deduced | Female Percentage | Male Percentage | LCI   | UCI   | LCI Count | UCI Count | Significance <sup>44</sup> | Adjusted P-Value |
|------------------------------------------------|--------|--------|---------|-----------------|----------------------|-------------------|-----------------|-------|-------|-----------|-----------|----------------------------|------------------|
| RSC Published Articles' Corresponding Authors  | 35206  | 118443 | 174039  | 327688          | 153649               | 22.9              | 77.1            | 22.7  | 23.12 | 34884.16  | 35529.92  | Significant                | 0                |
| RSC Citing RSC Articles' Corresponding Authors | 11132  | 43606  | 86335   | 141073          | 54738                | 20.3              | 79.7            | 20    | 20.68 | 10948.57  | 11317.71  | Significant                | 0                |
| RSC Cited RSC Articles' Corresponding Authors  | 10906  | 48379  | 81788   | 141073          | 59285                | 18.4              | 81.6            | 18.09 | 18.71 | 10722.31  | 11092.12  | Significant                | 0                |
| RSC Published RSC Articles' First Authors      | 51007  | 103217 | 173464  | 327688          | 154224               | 33.1              | 66.9            | 32.84 | 33.31 | 50645.53  | 51369.78  | Significant                | 0                |
| RSC Citing RSC Articles' First Authors         | 17659  | 39193  | 84221   | 141073          | 56852                | 31.1              | 68.9            | 30.68 | 31.44 | 17443.48  | 17875.98  | Significant                | 0                |
| RSC Cited RSC Articles' First Authors          | 18160  | 41865  | 81048   | 141073          | 60025                | 30.3              | 69.7            | 29.89 | 30.62 | 17940.18  | 18381.33  | Significant                | 0                |

<sup>44</sup> Significance calculated compared to baseline of average for all authors of original submissions to the RSC (35.8%)

**Table G1b (for Figure 25): Breakdown of articles' corresponding author gender by number of RSC citations to it**

| Number of RSC citations | Female | Male  | Unknown | Total For Level | Total Gender Deduced | Female Percentage | Male Percentage | LCI   | UCI    | LCI Count | UCI Count | Significance <sup>45</sup> | Adjusted P-Value |
|-------------------------|--------|-------|---------|-----------------|----------------------|-------------------|-----------------|-------|--------|-----------|-----------|----------------------------|------------------|
| 1                       | 3073   | 11735 | 19505   | 34313           | 14808                | 20.8              | 79.2            | 20.11 | 21.41  | 2977.40   | 3170.85   | Significant                | 5.05e-09         |
| 2                       | 1970   | 7838  | 12270   | 22078           | 9808                 | 20.1              | 79.9            | 19.30 | 20.89  | 1893.38   | 2048.92   |                            | 1.99e-01         |
| 3                       | 1347   | 5463  | 8607    | 15417           | 6810                 | 19.8              | 80.2            | 18.85 | 20.74  | 1283.73   | 1412.59   |                            | 1.00e+00         |
| 4                       | 808    | 3984  | 6556    | 11348           | 4792                 | 16.9              | 83.1            | 15.83 | 17.95  | 758.46    | 860.08    |                            | 1.00e+00         |
| 5                       | 650    | 3045  | 4960    | 8655            | 3695                 | 17.6              | 82.4            | 16.40 | 18.85  | 605.87    | 696.62    |                            | 1.00e+00         |
| 6                       | 492    | 2274  | 3984    | 6750            | 2766                 | 17.8              | 82.2            | 16.41 | 19.26  | 453.81    | 532.67    |                            | 1.00e+00         |
| 7                       | 427    | 1764  | 3332    | 5523            | 2191                 | 19.5              | 80.5            | 17.88 | 21.20  | 391.82    | 464.52    |                            | 1.00e+00         |
| 8                       | 248    | 1408  | 2824    | 4480            | 1656                 | 15.0              | 85.0            | 13.34 | 16.78  | 220.85    | 277.83    |                            | 4.34e-01         |
| 9                       | 198    | 1188  | 2322    | 3708            | 1386                 | 14.3              | 85.7            | 12.54 | 16.23  | 173.80    | 224.94    |                            | 7.84e-02         |
| 10                      | 180    | 990   | 1860    | 3030            | 1170                 | 15.4              | 84.6            | 13.43 | 17.57  | 157.10    | 205.55    |                            | 1.00e+00         |
| 11                      | 231    | 693   | 1760    | 2684            | 924                  | 25.0              | 75.0            | 22.31 | 27.89  | 206.18    | 257.74    | Significant                | 5.82e-04         |
| 12                      | 120    | 744   | 1356    | 2220            | 864                  | 13.9              | 86.1            | 11.74 | 16.36  | 101.41    | 141.36    |                            | 4.42e-01         |
| 13                      | 91     | 793   | 1157    | 2041            | 884                  | 10.3              | 89.7            | 8.45  | 12.48  | 74.72     | 110.32    | Significant                | 2.92e-08         |
| 14                      | 112    | 490   | 854     | 1456            | 602                  | 18.6              | 81.4            | 15.69 | 21.92  | 94.47     | 131.93    |                            | 1.00e+00         |
| 15                      | 75     | 570   | 975     | 1620            | 645                  | 11.6              | 88.4            | 9.37  | 14.34  | 60.42     | 92.51     | Significant                | 2.24e-03         |
| 16                      | 64     | 480   | 848     | 1392            | 544                  | 11.8              | 88.2            | 9.31  | 14.76  | 50.64     | 80.28     | Significant                | 1.71e-02         |
| 17                      | 102    | 493   | 680     | 1275            | 595                  | 17.1              | 82.9            | 14.32 | 20.39  | 85.21     | 121.30    |                            | 1.00e+00         |
| 18                      | 108    | 486   | 504     | 1098            | 594                  | 18.2              | 81.8            | 15.28 | 21.49  | 90.77     | 127.66    |                            | 1.00e+00         |
| 19                      | 38     | 285   | 418     | 741             | 323                  | 11.8              | 88.2            | 8.66  | 15.76  | 27.99     | 50.92     |                            | 4.94e-01         |
| 20                      | 80     | 120   | 520     | 720             | 200                  | 40.0              | 60.0            | 33.46 | 46.92  | 66.92     | 93.84     | Significant                | 2.71e-10         |
| 21                      | 0      | 252   | 357     | 609             | 252                  | 0.0               | 100.0           | -0.31 | 1.81   | NaN       | NaN       | Significant                | 2.49e-20         |
| 22                      | 66     | 110   | 506     | 682             | 176                  | 37.5              | 62.5            | 30.68 | 44.85  | 54.00     | 78.94     | Significant                | 4.13e-07         |
| 23                      | 0      | 138   | 391     | 529             | 138                  | 0.0               | 100.0           | -0.55 | 3.26   | NaN       | NaN       | Significant                | 2.02e-10         |
| 24                      | 48     | 96    | 264     | 408             | 144                  | 33.3              | 66.7            | 26.14 | 41.39  | 37.65     | 59.60     | Significant                | 2.88e-03         |
| 25                      | 75     | 100   | 300     | 475             | 175                  | 42.9              | 57.1            | 35.75 | 50.27  | 62.57     | 87.97     | Significant                | 1.54e-11         |
| 26                      | 0      | 208   | 182     | 390             | 208                  | 0.0               | 100.0           | -0.37 | 2.18   | NaN       | NaN       | Significant                | 1.34e-16         |
| 27                      | 27     | 54    | 135     | 216             | 81                   | 33.3              | 66.7            | 24.00 | 44.17  | 19.44     | 35.78     |                            | 1.09e-01         |
| 28                      | 0      | 280   | 112     | 392             | 280                  | 0.0               | 100.0           | -0.28 | 1.63   | NaN       | NaN       | Significant                | 9.01e-23         |
| 29                      | 29     | 232   | 261     | 522             | 261                  | 11.1              | 88.9            | 7.81  | 15.54  | 20.38     | 40.57     |                            | 4.59e-01         |
| 30                      | 30     | 90    | 90      | 210             | 120                  | 25.0              | 75.0            | 18.07 | 33.48  | 21.69     | 40.17     |                            | 1.00e+00         |
| 31                      | 31     | 93    | 310     | 434             | 124                  | 25.0              | 75.0            | 18.17 | 33.33  | 22.53     | 41.33     |                            | 1.00e+00         |
| 32                      | 0      | 0     | 192     | 192             | 0                    | 0.0               | 0.0             | 0.00  | 0.00   | 0.00      | 0.00      |                            | 0.00e+00         |
| 33                      | 33     | 66    | 297     | 396             | 99                   | 33.3              | 66.7            | 24.80 | 43.11  | 24.56     | 42.68     | Significant                | 3.72e-02         |
| 34                      | 0      | 170   | 204     | 374             | 170                  | 0.0               | 100.0           | -0.45 | 2.66   | NaN       | NaN       | Significant                | 3.16e-13         |
| 35                      | 0      | 70    | 105     | 175             | 70                   | 0.0               | 100.0           | -1.03 | 6.23   | NaN       | NaN       | Significant                | 8.59e-05         |
| 36                      | 0      | 72    | 144     | 216             | 72                   | 0.0               | 100.0           | -1.00 | 6.07   | NaN       | NaN       | Significant                | 5.61e-05         |
| 37                      | 37     | 111   | 148     | 296             | 148                  | 25.0              | 75.0            | 18.69 | 32.58  | 27.66     | 48.21     |                            | 1.00e+00         |
| 38                      | 0      | 114   | 152     | 266             | 114                  | 0.0               | 100.0           | -0.66 | 3.92   | NaN       | NaN       | Significant                | 2.11e-08         |
| 39                      | 0      | 39    | 117     | 156             | 39                   | 0.0               | 100.0           | -1.71 | 10.68  | NaN       | NaN       | Significant                | 2.39e-02         |
| 40                      | 0      | 120   | 40      | 160             | 120                  | 0.0               | 100.0           | -0.63 | 3.73   | NaN       | NaN       | Significant                | 5.62e-09         |
| 41                      | 0      | 0     | 123     | 123             | 0                    | 0.0               | 0.0             | 0.00  | 0.00   | 0.00      | 0.00      |                            | 0.00e+00         |
| 42                      | 0      | 0     | 42      | 42              | 0                    | 0.0               | 0.0             | 0.00  | 0.00   | 0.00      | 0.00      |                            | 0.00e+00         |
| 43                      | 0      | 43    | 43      | 86              | 43                   | 0.0               | 100.0           | -1.58 | 9.78   | NaN       | NaN       | Significant                | 1.07e-02         |
| 45                      | 0      | 0     | 180     | 180             | 0                    | 0.0               | 0.0             | 0.00  | 0.00   | 0.00      | 0.00      |                            | 0.00e+00         |
| 46                      | 0      | 46    | 46      | 92              | 46                   | 0.0               | 100.0           | -1.49 | 9.20   | NaN       | NaN       | Significant                | 7.53e-03         |
| 47                      | 0      | 0     | 47      | 47              | 0                    | 0.0               | 0.0             | 0.00  | 0.00   | 0.00      | 0.00      |                            | 0.00e+00         |
| 48                      | 0      | 48    | 96      | 144             | 48                   | 0.0               | 100.0           | -1.44 | 8.85   | NaN       | NaN       | Significant                | 4.97e-03         |
| 49                      | 0      | 98    | 98      | 196             | 98                   | 0.0               | 100.0           | -0.76 | 4.53   | NaN       | NaN       | Significant                | 3.74e-07         |
| 50                      | 0      | 50    | 100     | 150             | 50                   | 0.0               | 100.0           | -1.39 | 8.52   | NaN       | NaN       | Significant                | 3.29e-03         |
| 51                      | 51     | 0     | 51      | 102             | 51                   | 100.0             | 0.0             | 91.63 | 101.36 | 46.73     | 51.70     | Significant                | 1.63e-36         |
| 52                      | 0      | 52    | 52      | 104             | 52                   | 0.0               | 100.0           | -1.34 | 8.22   | NaN       | NaN       | Significant                | 2.18e-03         |
| 55                      | 0      | 110   | 0       | 110             | 110                  | 0.0               | 100.0           | -0.68 | 4.05   | NaN       | NaN       | Significant                | 2.94e-08         |
| 56                      | 0      | 56    | 0       | 56              | 56                   | 0.0               | 100.0           | -1.26 | 7.68   | NaN       | NaN       | Significant                | 9.58e-04         |
| 57                      | 0      | 57    | 0       | 57              | 57                   | 0.0               | 100.0           | -1.24 | 7.55   | NaN       | NaN       | Significant                | 1.01e-03         |
| 58                      | 0      | 58    | 0       | 58              | 58                   | 0.0               | 100.0           | -1.22 | 7.43   | NaN       | NaN       | Significant                | 6.37e-04         |
| 59                      | 0      | 0     | 118     | 118             | 0                    | 0.0               | 0.0             | 0.00  | 0.00   | 0.00      | 0.00      |                            | 0.00e+00         |
| 61                      | 0      | 61    | 61      | 122             | 61                   | 0.0               | 100.0           | -1.16 | 7.09   | NaN       | NaN       | Significant                | 4.35e-04         |
| 63                      | 0      | 63    | 0       | 63              | 63                   | 0.0               | 100.0           | -1.13 | 6.88   | NaN       | NaN       | Significant                | 2.86e-04         |
| 64                      | 0      | 64    | 0       | 64              | 64                   | 0.0               | 100.0           | -1.12 | 6.78   | NaN       | NaN       | Significant                | 3.12e-04         |
| 65                      | 65     | 65    | 0       | 130             | 130                  | 50.0              | 50.0            | 41.53 | 58.47  | 53.99     | 76.01     | Significant                | 4.71e-14         |
| 68                      | 0      | 68    | 68      | 136             | 68                   | 0.0               | 100.0           | -1.06 | 6.40   | NaN       | NaN       | Significant                | 1.32e-04         |
| 74                      | 0      | 0     | 74      | 74              | 0                    | 0.0               | 0.0             | 0.00  | 0.00   | 0.00      | 0.00      |                            | 0.00e+00         |
| 76                      | 0      | 0     | 76      | 76              | 0                    | 0.0               | 0.0             | 0.00  | 0.00   | 0.00      | 0.00      |                            | 0.00e+00         |
| 77                      | 0      | 0     | 77      | 77              | 0                    | 0.0               | 0.0             | 0.00  | 0.00   | 0.00      | 0.00      |                            | 0.00e+00         |
| 81                      | 0      | 0     | 81      | 81              | 0                    | 0.0               | 0.0             | 0.00  | 0.00   | 0.00      | 0.00      |                            | 0.00e+00         |
| 82                      | 0      | 0     | 82      | 82              | 0                    | 0.0               | 0.0             | 0.00  | 0.00   | 0.00      | 0.00      |                            | 0.00e+00         |
| 87                      | 0      | 0     | 87      | 87              | 0                    | 0.0               | 0.0             | 0.00  | 0.00   | 0.00      | 0.00      |                            | 0.00e+00         |
| 88                      | 0      | 0     | 88      | 88              | 0                    | 0.0               | 0.0             | 0.00  | 0.00   | 0.00      | 0.00      |                            | 0.00e+00         |
| 89                      | 0      | 89    | 0       | 89              | 89                   | 0.0               | 100.0           | -0.83 | 4.96   | NaN       | NaN       | Significant                | 1.97e-06         |
| 93                      | 0      | 93    | 0       | 93              | 93                   | 0.0               | 100.0           | -0.79 | 4.76   | NaN       | NaN       | Significant                | 8.48e-07         |
| 135                     | 0      | 0     | 135     | 135             | 0                    | 0.0               | 0.0             | 0.00  | 0.00   | 0.00      | 0.00      |                            | 0.00e+00         |
| 178                     | 0      | 0     | 178     | 178             | 0                    | 0.0               | 0.0             | 0.00  | 0.00   | 0.00      | 0.00      |                            | 0.00e+00         |
| 186                     | 0      | 0     | 186     | 186             | 0                    | 0.0               | 0.0             | 0.00  | 0.00   | 0.00      | 0.00      |                            | 0.00e+00         |

<sup>45</sup> Significance calculated compared to baseline of average for all corresponding authors of cited articles, 18.4%

**Table G2 (for Figure 26): Binomial GLM model of citation success of published articles and corresponding author gender controlled by whether the article was unanimously accepted in its first revision.**

| CorrespondingAuthorGender | UnanimousAccept      | fit <sup>46</sup> | Standard Error | LCI    | UCI    | Population Size |
|---------------------------|----------------------|-------------------|----------------|--------|--------|-----------------|
| F                         | Not unanimous accept | 0.0354            | 0.0240         | 0.0344 | 0.0365 | 50764           |
| M                         | Not unanimous accept | 0.0445            | 0.0123         | 0.0439 | 0.0452 | 155831          |
| F                         | Unanimous accept     | 0.1671            | 0.0308         | 0.1617 | 0.1727 | 7564            |
| M                         | Unanimous accept     | 0.1972            | 0.0150         | 0.1942 | 0.2003 | 28122           |

---

<sup>46</sup> Model fit: Cited ~ UnanimousAccept \* CorrAuthGender

**Table G3 (for Figure 27): Breakdown of cited corresponding author gender of citations by the cited article’s publication year**

| Cited article year | Female | Male  | Unknown | Total For Level | Total Gender Deduced | Female Percentage | Male Percentage | LCI   | UCI   | LCI Count | UCI Count | Significance <sup>47</sup> | Adjusted P-Value |
|--------------------|--------|-------|---------|-----------------|----------------------|-------------------|-----------------|-------|-------|-----------|-----------|----------------------------|------------------|
| 2012               | 5212   | 24115 | 37803   | 67130           | 29327                | 17.8              | 82.2            | 17.34 | 18.21 | 5084.92   | 5341.55   |                            | 1.000            |
| 2013               | 2635   | 12269 | 19723   | 34627           | 14904                | 17.7              | 82.3            | 17.08 | 18.30 | 2544.95   | 2727.53   |                            | 1.000            |
| 2014               | 767    | 3255  | 6183    | 10205           | 4022                 | 19.1              | 80.9            | 17.89 | 20.31 | 719.35    | 817.02    |                            | 1.000            |
| 2015               | 671    | 2579  | 5296    | 8546            | 3250                 | 20.6              | 79.4            | 19.29 | 22.07 | 626.90    | 717.35    |                            | 1.000            |
| 2016               | 689    | 2617  | 5267    | 8573            | 3306                 | 20.8              | 79.2            | 19.49 | 22.26 | 644.35    | 735.89    |                            | 1.000            |
| 2017               | 673    | 2537  | 5376    | 8586            | 3210                 | 21.0              | 79.0            | 19.59 | 22.41 | 628.91    | 719.32    |                            | 0.716            |
| 2018               | 259    | 1007  | 2140    | 3406            | 1266                 | 20.5              | 79.5            | 18.33 | 22.77 | 232.00    | 288.27    |                            | 1.000            |

<sup>47</sup> Significance calculated compared to baseline of average for all corresponding authors of cited articles, 18.4%



**Table G4 (for Figure 28): Breakdown of gender of de-duplicated authors of all citing articles and number of self-citations in RSC citation data set**

| RSC self-citation count | Female | Male  | Unknown | Total For Level | Total Gender Deduced | Female Percentage | Male Percentage | LCI   | UCI    | LCI Count | UCI Count | Significance <sup>48</sup> | Adjusted P-Value |
|-------------------------|--------|-------|---------|-----------------|----------------------|-------------------|-----------------|-------|--------|-----------|-----------|----------------------------|------------------|
| 0                       | 8990   | 19880 | 33803   | 62673           | 28870                | 31.1              | 68.9            | 30.61 | 31.68  | 8836.52   | 9144.93   | Significant                | 1.43e-319        |
| 1                       | 4812   | 11629 | 19071   | 35512           | 16441                | 29.3              | 70.7            | 28.58 | 29.97  | 4698.46   | 4927.13   | Significant                | 3.11e-246        |
| 2                       | 836    | 2306  | 4337    | 7479            | 3142                 | 26.6              | 73.4            | 25.09 | 28.18  | 788.36    | 885.43    | Significant                | 3.60e-26         |
| 3                       | 253    | 809   | 1700    | 2762            | 1062                 | 23.8              | 76.2            | 21.36 | 26.48  | 226.80    | 281.20    | Significant                | 1.12e-02         |
| 4                       | 112    | 416   | 764     | 1292            | 528                  | 21.2              | 78.8            | 17.93 | 24.91  | 94.69     | 131.51    |                            | 1.00e+00         |
| 5                       | 59     | 197   | 479     | 735             | 256                  | 23.0              | 77.0            | 18.29 | 28.60  | 46.83     | 73.21     |                            | 1.00e+00         |
| 6                       | 29     | 120   | 273     | 422             | 149                  | 19.5              | 80.5            | 13.86 | 26.60  | 20.65     | 39.63     |                            | 1.00e+00         |
| 7                       | 26     | 68    | 173     | 267             | 94                   | 27.7              | 72.3            | 19.59 | 37.48  | 18.41     | 35.24     |                            | 1.00e+00         |
| 8                       | 9      | 57    | 145     | 211             | 66                   | 13.6              | 86.4            | 7.12  | 24.15  | 4.70      | 15.94     |                            | 1.00e+00         |
| 9                       | 13     | 36    | 82      | 131             | 49                   | 26.5              | 73.5            | 16.10 | 40.37  | 7.89      | 19.78     |                            | 1.00e+00         |
| 10                      | 7      | 30    | 64      | 101             | 37                   | 18.9              | 81.1            | 9.17  | 34.51  | 3.39      | 12.77     |                            | 1.00e+00         |
| 11                      | 5      | 15    | 40      | 60              | 20                   | 25.0              | 75.0            | 10.81 | 47.25  | 2.16      | 9.45      |                            | 1.00e+00         |
| 12                      | 5      | 18    | 36      | 59              | 23                   | 21.7              | 78.3            | 9.23  | 42.33  | 2.12      | 9.74      |                            | 1.00e+00         |
| 13                      | 0      | 13    | 26      | 39              | 13                   | 0.0               | 100.0           | -3.78 | 26.59  | NaN       | NaN       |                            | 1.00e+00         |
| 14                      | 0      | 11    | 21      | 32              | 11                   | 0.0               | 100.0           | -4.14 | 30.02  | NaN       | NaN       |                            | 1.00e+00         |
| 15                      | 2      | 9     | 14      | 25              | 11                   | 18.2              | 81.8            | 3.99  | 48.85  | 0.44      | 5.37      |                            | 1.00e+00         |
| 16                      | 3      | 9     | 15      | 27              | 12                   | 25.0              | 75.0            | 8.27  | 53.85  | 0.99      | 6.46      |                            | 1.00e+00         |
| 17                      | 1      | 2     | 10      | 13              | 3                    | 33.3              | 66.7            | 5.63  | 79.76  | 0.17      | 2.39      |                            | 1.00e+00         |
| 18                      | 1      | 5     | 10      | 16              | 6                    | 16.7              | 83.3            | 1.14  | 58.22  | 0.07      | 3.49      |                            | 1.00e+00         |
| 19                      | 0      | 4     | 6       | 10              | 4                    | 0.0               | 100.0           | -5.61 | 54.60  | NaN       | NaN       |                            | 1.00e+00         |
| 20                      | 1      | 5     | 6       | 12              | 6                    | 16.7              | 83.3            | 1.14  | 58.22  | 0.07      | 3.49      |                            | 1.00e+00         |
| 21                      | 1      | 1     | 4       | 6               | 2                    | 50.0              | 50.0            | 9.45  | 90.55  | 0.19      | 1.81      |                            | 6.68e-01         |
| 22                      | 2      | 3     | 2       | 7               | 5                    | 40.0              | 60.0            | 11.60 | 77.09  | 0.58      | 3.85      |                            | 1.00e+00         |
| 23                      | 1      | 3     | 4       | 8               | 4                    | 25.0              | 75.0            | 3.41  | 71.09  | 0.14      | 2.84      |                            | 1.00e+00         |
| 24                      | 2      | 3     | 2       | 7               | 5                    | 40.0              | 60.0            | 11.60 | 77.09  | 0.58      | 3.85      |                            | 1.00e+00         |
| 25                      | 3      | 4     | 3       | 10              | 7                    | 42.9              | 57.1            | 15.75 | 75.02  | 1.10      | 5.25      |                            | 8.52e-01         |
| 26                      | 0      | 1     | 2       | 3               | 1                    | 0.0               | 100.0           | -3.90 | 83.25  | NaN       | NaN       |                            | 1.00e+00         |
| 27                      | 0      | 1     | 1       | 2               | 1                    | 0.0               | 100.0           | -3.90 | 83.25  | NaN       | NaN       |                            | 1.00e+00         |
| 28                      | 0      | 0     | 3       | 3               | 0                    | 0.0               | 0.0             | 0.00  | 0.00   | 0.00      | 0.00      |                            | 0.00e+00         |
| 29                      | 0      | 1     | 0       | 1               | 1                    | 0.0               | 100.0           | -3.90 | 83.25  | NaN       | NaN       |                            | 1.00e+00         |
| 30                      | 0      | 0     | 1       | 1               | 0                    | 0.0               | 0.0             | 0.00  | 0.00   | 0.00      | 0.00      |                            | 0.00e+00         |
| 33                      | 0      | 0     | 1       | 1               | 0                    | 0.0               | 0.0             | 0.00  | 0.00   | 0.00      | 0.00      |                            | 0.00e+00         |
| 35                      | 0      | 1     | 0       | 1               | 1                    | 0.0               | 100.0           | -3.90 | 83.25  | NaN       | NaN       |                            | 1.00e+00         |
| 36                      | 0      | 0     | 1       | 1               | 0                    | 0.0               | 0.0             | 0.00  | 0.00   | 0.00      | 0.00      |                            | 0.00e+00         |
| 37                      | 1      | 0     | 2       | 3               | 1                    | 100.0             | 0.0             | 16.75 | 103.90 | 0.17      | 1.04      |                            | 1.84e-01         |
| 40                      | 0      | 1     | 1       | 2               | 1                    | 0.0               | 100.0           | -3.90 | 83.25  | NaN       | NaN       |                            | 1.00e+00         |
| 41                      | 0      | 0     | 1       | 1               | 0                    | 0.0               | 0.0             | 0.00  | 0.00   | 0.00      | 0.00      |                            | 0.00e+00         |
| 56                      | 1      | 0     | 0       | 1               | 1                    | 100.0             | 0.0             | 16.75 | 103.90 | 0.17      | 1.04      |                            | 1.84e-01         |

<sup>48</sup> Significance calculated compared to baseline of average for all corresponding authors of cited articles, 18.4%

**Table G5: Breakdown of cited corresponding author gender of citations and citing corresponding author gender**

| Citing corresponding Author Gender | Female | Male  | Unknown | Total For Level | Total Gender Deduced | Female Percentage | Male Percentage | LCI   | UCI   | LCI Count | UCI Count | Significance <sup>49</sup> | Adjusted P-Value |
|------------------------------------|--------|-------|---------|-----------------|----------------------|-------------------|-----------------|-------|-------|-----------|-----------|----------------------------|------------------|
| F                                  | 959    | 3721  | 5161    | 9841            | 4680                 | 20.5              | 79.5            | 19.36 | 21.67 | 906.01    | 1014.25   |                            | 1                |
| M                                  | 3321   | 15431 | 18450   | 37202           | 18752                | 17.7              | 82.3            | 17.17 | 18.26 | 3219.78   | 3424.70   |                            | 1                |
| U                                  | 5335   | 22823 | 48204   | 76362           | 28158                | 18.9              | 81.1            | 18.49 | 19.41 | 5207.31   | 5465.08   |                            | 1                |

<sup>49</sup> Significance calculated compared to baseline of average for all corresponding authors of cited articles, 18.4%

**Table G6a (for Figure 29): Gender breakdown of cited corresponding authors of citations by chemistry sub-discipline in comparison to that of corresponding authors of all accepted submissions**

| Chemistry sub-discipline       | Female | Male  | Unknown | Total For Level | Total Gender Deduced | Female Percentage | Male Percentage | LCI   | UCI   | LCI Count | UCI Count | Significance <sup>50</sup> | Adjusted P-Value |
|--------------------------------|--------|-------|---------|-----------------|----------------------|-------------------|-----------------|-------|-------|-----------|-----------|----------------------------|------------------|
| Analytical                     | 2291   | 8168  | 12809   | 23268           | 10459                | 21.9              | 78.1            | 21.12 | 22.71 | 2209      | 2375      | Significant                | 1.60e-15         |
| Biological                     | 1223   | 4161  | 4409    | 9793            | 5384                 | 22.7              | 77.3            | 21.62 | 23.85 | 1164      | 1284      | Significant                | 1.07e-11         |
| Catalysis                      | 1535   | 6543  | 12014   | 20092           | 8078                 | 19.0              | 81.0            | 18.16 | 19.87 | 1467      | 1605      |                            | 1.00e+00         |
| Chemical Biology and Medicinal | 1387   | 4627  | 4992    | 11006           | 6014                 | 23.1              | 76.9            | 22.02 | 24.14 | 1324      | 1452      | Significant                | 7.43e-16         |
| Energy                         | 1963   | 10570 | 22308   | 34841           | 12533                | 15.7              | 84.3            | 15.04 | 16.31 | 1885      | 2044      | Significant                | 9.43e-12         |
| Environmental                  | 476    | 1598  | 2399    | 4473            | 2074                 | 23.0              | 77.0            | 21.19 | 24.81 | 440       | 515       | Significant                | 4.28e-04         |
| Food                           | 299    | 852   | 1009    | 2160            | 1151                 | 26.0              | 74.0            | 23.53 | 28.59 | 271       | 329       | Significant                | 2.64e-07         |
| Inorganic                      | 1490   | 7946  | 8964    | 18400           | 9436                 | 15.8              | 84.2            | 15.07 | 16.54 | 1422      | 1561      | Significant                | 2.61e-07         |
| Materials                      | 4511   | 19549 | 34905   | 58965           | 24060                | 18.7              | 81.3            | 18.26 | 19.25 | 4394      | 4631      |                            | 1.00e+00         |
| Miscellaneous                  | 74     | 481   | 554     | 1109            | 555                  | 13.3              | 86.7            | 10.74 | 16.43 | 60        | 91        |                            | 9.73e-01         |
| Nanoscience                    | 3110   | 12493 | 30212   | 45815           | 15603                | 19.9              | 80.1            | 19.31 | 20.57 | 3013      | 3209      | Significant                | 1.60e-02         |
| Organic                        | 1232   | 6120  | 6618    | 13970           | 7352                 | 16.8              | 83.2            | 15.92 | 17.63 | 1171      | 1296      |                            | 1.00e+00         |
| Physical                       | 2140   | 10274 | 14518   | 26932           | 12414                | 17.2              | 82.8            | 16.58 | 17.91 | 2059      | 2224      |                            | 1.00e+00         |
| NA                             | 441    | 1657  | 4106    | 6204            | 2098                 | 21.0              | 79.0            | 19.33 | 22.82 | 406       | 479       |                            | 1.00e+00         |

<sup>50</sup> Significance calculated compared to baseline of average for original submissions from female corresponding authors (23.9%)

**Table G6b (for Figure 30): Binomial GLM model of cited corresponding author gender of citations, chemistry sub-discipline and journal impact factor**

| Impact factor (IF 2017) | Chemistry sub-discipline (cats) | fit <sup>51</sup> | Standard Error | LCI   | UCI   | Population Size |
|-------------------------|---------------------------------|-------------------|----------------|-------|-------|-----------------|
| 1.6                     | Analytical                      | 0.271             | 0.054          | 0.258 | 0.285 | 995             |
| 1.6                     | Biological                      | 0.309             | 0.080          | 0.288 | 0.332 | 349             |
| 1.6                     | Catalysis                       | 0.217             | 0.072          | 0.202 | 0.233 | 632             |
| 1.6                     | Chemical Biology and Medicinal  | 0.299             | 0.069          | 0.281 | 0.318 | 543             |
| 1.6                     | Energy                          | 0.148             | 0.070          | 0.137 | 0.159 | 826             |
| 1.6                     | Environmental                   | 0.234             | 0.099          | 0.212 | 0.257 | 487             |
| 1.6                     | Food                            | 0.337             | 0.126          | 0.302 | 0.374 | 176             |
| 1.6                     | Inorganic                       | 0.171             | 0.070          | 0.159 | 0.184 | 257             |
| 1.6                     | Materials                       | 0.225             | 0.041          | 0.216 | 0.234 | 1637            |
| 1.6                     | Miscellaneous                   | 0.174             | 0.244          | 0.133 | 0.223 | 48              |
| 1.6                     | Nanoscience                     | 0.228             | 0.052          | 0.216 | 0.240 | 1186            |
| 1.6                     | Organic                         | 0.210             | 0.069          | 0.196 | 0.225 | 608             |
| 1.6                     | Physical                        | 0.219             | 0.055          | 0.207 | 0.231 | 724             |
| 10                      | Analytical                      | 0.160             | 0.076          | 0.148 | 0.174 | 596             |
| 10                      | Biological                      | 0.142             | 0.103          | 0.127 | 0.159 | 428             |
| 10                      | Catalysis                       | 0.180             | 0.065          | 0.168 | 0.193 | 782             |
| 10                      | Chemical Biology and Medicinal  | 0.184             | 0.092          | 0.167 | 0.202 | 479             |
| 10                      | Energy                          | 0.197             | 0.053          | 0.186 | 0.208 | 1721            |
| 10                      | Environmental                   | 0.247             | 0.145          | 0.214 | 0.283 | 89              |
| 10                      | Food                            | 0.165             | 0.220          | 0.130 | 0.208 | 41              |
| 10                      | Inorganic                       | 0.133             | 0.090          | 0.120 | 0.147 | 860             |
| 10                      | Materials                       | 0.179             | 0.045          | 0.171 | 0.187 | 2033            |
| 10                      | Miscellaneous                   | 0.141             | 0.266          | 0.105 | 0.188 | 108             |
| 10                      | Nanoscience                     | 0.220             | 0.050          | 0.209 | 0.231 | 1349            |
| 10                      | Organic                         | 0.157             | 0.071          | 0.145 | 0.169 | 862             |
| 10                      | Physical                        | 0.140             | 0.074          | 0.129 | 0.152 | 941             |
| 13                      | Analytical                      | 0.131             | 0.116          | 0.115 | 0.149 | 9               |
| 13                      | Biological                      | 0.104             | 0.160          | 0.086 | 0.124 | 4               |
| 13                      | Catalysis                       | 0.168             | 0.105          | 0.150 | 0.187 | 4               |
| 13                      | Chemical Biology and Medicinal  | 0.152             | 0.142          | 0.130 | 0.177 | 1               |
| 13                      | Energy                          | 0.217             | 0.086          | 0.199 | 0.237 | 25              |
| 13                      | Environmental                   | 0.252             | 0.216          | 0.204 | 0.308 | 2               |
| 13                      | Food                            | 0.124             | 0.327          | 0.085 | 0.177 | 1               |
| 13                      | Inorganic                       | 0.122             | 0.140          | 0.104 | 0.142 | 4               |
| 13                      | Materials                       | 0.164             | 0.071          | 0.152 | 0.177 | 73              |
| 13                      | Miscellaneous                   | 0.131             | 0.412          | 0.082 | 0.203 | 0               |
| 13                      | Nanoscience                     | 0.217             | 0.079          | 0.200 | 0.235 | 47              |
| 13                      | Organic                         | 0.141             | 0.112          | 0.125 | 0.159 | 0               |
| 13                      | Physical                        | 0.118             | 0.114          | 0.104 | 0.134 | 22              |
| 4.5                     | Analytical                      | 0.228             | 0.026          | 0.222 | 0.234 | 3592            |
| 4.5                     | Biological                      | 0.241             | 0.039          | 0.232 | 0.250 | 1614            |
| 4.5                     | Catalysis                       | 0.204             | 0.040          | 0.196 | 0.212 | 2096            |
| 4.5                     | Chemical Biology and Medicinal  | 0.255             | 0.036          | 0.246 | 0.264 | 1985            |
| 4.5                     | Energy                          | 0.163             | 0.041          | 0.156 | 0.171 | 1906            |
| 4.5                     | Environmental                   | 0.238             | 0.059          | 0.225 | 0.252 | 601             |
| 4.5                     | Food                            | 0.269             | 0.073          | 0.251 | 0.288 | 523             |
| 4.5                     | Inorganic                       | 0.157             | 0.034          | 0.151 | 0.163 | 4220            |
| 4.5                     | Materials                       | 0.208             | 0.022          | 0.203 | 0.213 | 6578            |
| 4.5                     | Miscellaneous                   | 0.162             | 0.140          | 0.139 | 0.188 | 167             |
| 4.5                     | Nanoscience                     | 0.225             | 0.028          | 0.219 | 0.231 | 2878            |
| 4.5                     | Organic                         | 0.190             | 0.038          | 0.183 | 0.198 | 1900            |
| 4.5                     | Physical                        | 0.188             | 0.028          | 0.183 | 0.194 | 4915            |
| 7.4                     | Analytical                      | 0.190             | 0.043          | 0.182 | 0.199 | 3660            |
| 7.4                     | Biological                      | 0.184             | 0.058          | 0.173 | 0.195 | 1852            |
| 7.4                     | Catalysis                       | 0.191             | 0.037          | 0.184 | 0.198 | 2574            |
| 7.4                     | Chemical Biology and Medicinal  | 0.215             | 0.053          | 0.204 | 0.227 | 1488            |
| 7.4                     | Energy                          | 0.180             | 0.033          | 0.174 | 0.187 | 2563            |
| 7.4                     | Environmental                   | 0.243             | 0.089          | 0.222 | 0.264 | 414             |
| 7.4                     | Food                            | 0.210             | 0.133          | 0.183 | 0.239 | 226             |
| 7.4                     | Inorganic                       | 0.144             | 0.050          | 0.136 | 0.152 | 2362            |
| 7.4                     | Materials                       | 0.192             | 0.026          | 0.187 | 0.197 | 5884            |
| 7.4                     | Miscellaneous                   | 0.151             | 0.161          | 0.126 | 0.179 | 134             |
| 7.4                     | Nanoscience                     | 0.222             | 0.028          | 0.216 | 0.229 | 4722            |
| 7.4                     | Organic                         | 0.172             | 0.042          | 0.165 | 0.180 | 2451            |
| 7.4                     | Physical                        | 0.161             | 0.043          | 0.154 | 0.169 | 2697            |

**Table H1 (for Figures 31): Breakdown of living Chemists with highest H-index ranking by gender and H-index**

<sup>51</sup> Model fit: CitedCorrAuthorGender ~cats \* IF2017

| H-index range  | Female | Male | Unknown | Total For Level | Total Gender Deduced | Female Percentage | Male Percentage | LCI   | UCI   | LCI Count | UCI Count | Significance <sup>52</sup> | Adjusted P-Value |
|----------------|--------|------|---------|-----------------|----------------------|-------------------|-----------------|-------|-------|-----------|-----------|----------------------------|------------------|
| 055-059        | 9      | 87   | 0       | 96              | 96                   | 9.4               | 90.6            | 4.82  | 17.06 | 4.62      | 16.38     | Significant                | 5.33e-07         |
| 060-064        | 4      | 110  | 0       | 114             | 114                  | 3.5               | 96.5            | 1.08  | 8.97  | 1.23      | 10.22     | Significant                | 1.35e-14         |
| 065-069        | 4      | 70   | 0       | 74              | 74                   | 5.4               | 94.6            | 1.72  | 13.50 | 1.27      | 9.99      | Significant                | 8.16e-08         |
| 070-074        | 0      | 72   | 0       | 72              | 72                   | 0.0               | 100.0           | -1.00 | 6.07  | NaN       | NaN       | Significant                | 1.67e-12         |
| 075-079        | 0      | 57   | 0       | 57              | 57                   | 0.0               | 100.0           | -1.24 | 7.55  | NaN       | NaN       | Significant                | 8.87e-10         |
| 080-084        | 1      | 34   | 0       | 35              | 35                   | 2.9               | 97.1            | -0.77 | 15.81 | -0.27     | 5.53      | Significant                | 2.72e-04         |
| 085-089        | 0      | 29   | 0       | 29              | 29                   | 0.0               | 100.0           | -2.18 | 13.87 | NaN       | NaN       | Significant                | 1.37e-04         |
| 090-094        | 0      | 18   | 0       | 18              | 18                   | 0.0               | 100.0           | -3.08 | 20.67 | NaN       | NaN       | Significant                | 1.24e-02         |
| 095-099        | 1      | 9    | 0       | 10              | 10                   | 10.0              | 90.0            | -0.39 | 42.60 | -0.04     | 4.26      |                            | 1.00e+00         |
| 100-104        | 0      | 14   | 0       | 14              | 14                   | 0.0               | 100.0           | -3.62 | 25.15 | NaN       | NaN       | Significant                | 4.75e-02         |
| 105-109        | 0      | 9    | 0       | 9               | 9                    | 0.0               | 100.0           | -4.55 | 34.46 | NaN       | NaN       |                            | 2.82e-01         |
| 110-114        | 0      | 5    | 0       | 5               | 5                    | 0.0               | 100.0           | -5.46 | 48.91 | NaN       | NaN       |                            | 8.38e-01         |
| 115-119        | 0      | 4    | 0       | 4               | 4                    | 0.0               | 100.0           | -5.61 | 54.60 | NaN       | NaN       |                            | 1.00e+00         |
| 120-124        | 0      | 3    | 0       | 3               | 3                    | 0.0               | 100.0           | -5.60 | 61.75 | NaN       | NaN       |                            | 1.00e+00         |
| 125-129        | 0      | 3    | 0       | 3               | 3                    | 0.0               | 100.0           | -5.60 | 61.75 | NaN       | NaN       |                            | 1.00e+00         |
| 130-134        | 0      | 1    | 0       | 1               | 1                    | 0.0               | 100.0           | -3.90 | 83.25 | NaN       | NaN       |                            | 1.00e+00         |
| 140-144        | 0      | 2    | 0       | 2               | 2                    | 0.0               | 100.0           | -5.22 | 70.98 | NaN       | NaN       |                            | 1.00e+00         |
| 145 or greater | 0      | 1    | 0       | 1               | 1                    | 0.0               | 100.0           | -3.90 | 83.25 | NaN       | NaN       |                            | 1.00e+00         |

---

<sup>52</sup> Significance calculated compared to baseline of average for all authors of original submissions to the RSC (35.8%)
